# Supplementary material for: Prevalence and richness of malaria and malaria-like parasites in wild birds from different biomes in South America
Source: PeerJ. 2022 May 19;10:e13485. doi: 10.7717/peerj.13485 (PMC9124460; doi:10.7717/peerj.13485)
Supplement: Supplemental Information 1 — All birds analysed depicting their infection by Plasmodium or Haemoproteus. [file peerj-10-13485-s001.xls]

## Sheet: Plan1
SPECIES	DATE	SEASON	BIOME	LOCALITY	DIAG	LINEAGE	HAPLOTYPE
Aratinga_pertinax	2004-01-10	dry	Arid_Zone_Ven	Coro_	1	Haemoproteus_sp	VEN02
Aratinga_pertinax	2004-11-27	dry	Arid_Zone_Ven	Padre_Diego	1	NO_ID	NO_ID
Aratinga_pertinax	2004-11-27	dry	Arid_Zone_Ven	Padre_Diego	1	Haemoproteus_sp__	VEN04
Aratinga_pertinax	2004-06-12	dry	Arid_Zone_Ven	Murrión,_Margarita_Island	0	NA	NA
Aratinga_pertinax	2004-07-12	rain	Arid_Zone_Ven	Murrión,_Margarita_Island	1	NO_ID	NO_ID
Aratinga_pertinax	2004-12-18	rain	Arid_Zone_Ven	Nuevo_Unare	1	Haemoproteus_sp	VEN02
Aratinga_pertinax	2005-03-28	dry	Arid_Zone_Ven	Padre_Diego	0	NA	NA
Aratinga_pertinax	2005-03-29	dry	Arid_Zone_Ven	Padre_Diego	1	Haemoproteus_sp__	VEN04
Aratinga_pertinax	2005-04-28	dry	Arid_Zone_Ven	La_Chica,_Margarita_Island	1	Haemoproteus_sp__	VEN04
Aratinga_pertinax	2005-05-25	dry	Arid_Zone_Ven	Los_Camazos_	1	NO_ID	NO_ID
Aratinga_pertinax	2005-06-22	dry	Arid_Zone_Ven	Nuevo_Unare_	0	NA	NA
Melanerpes_rubricapillus	2005-05-23	dry	Arid_Zone_Ven	Banco_de_Baragua	0	NA	NA
Melanerpes_rubricapillus	2005-05-23	dry	Arid_Zone_Ven	Banco_de_Baragua	1	Haemoproteus_sp	VEN16
Melanerpes_rubricapillus	2005-06-05	dry	Arid_Zone_Ven	Península_de_Araya	1	NO_ID	NO_ID
Melanerpes_rubricapillus	2005-06-14	dry	Arid_Zone_Ven	La_Chica,_Margarita_Island	0	NA	NA
Melanerpes_rubricapillus	2005-06-27	dry	Arid_Zone_Ven	Cerro_Santa_Ana	1	NO_ID	NO_ID
Melanerpes_rubricapillus	2005-07-09	rain	Arid_Zone_Ven	La_Zábila	0	NA	NA
Melanerpes_rubricapillus	2005-07-14	rain	Arid_Zone_Ven	Banco_de_Baragua	1	Haemoproteus_sp	VEN02
Melanerpes_rubricapillus	2005-07-14	rain	Arid_Zone_Ven	Banco_de_Baragua	1	NO_ID	NO_ID
Melanerpes_rubricapillus	2005-07-23	rain	Arid_Zone_Ven	Península_de_Araya	1	NO_ID	NO_ID
Melanerpes_rubricapillus	2005-07-31	rain	Arid_Zone_Ven	Nuevo_Unare	1	NO_ID	NO_ID
Melanerpes_rubricapillus	2005-08-07	rain	Arid_Zone_Ven	El_Indio,_Margarita_Island	1	NO_ID	NO_ID
Melanerpes_rubricapillus	2006-05-14	dry	Arid_Zone_Ven	La_Vela_de_Coro	1	Haemoproteus_sp	VEN02
Melanerpes_rubricapillus	2006-05-14	dry	Arid_Zone_Ven	La_Vela_de_Coro	1	Haemoproteus_sp	VEN02
Melanerpes_rubricapillus	2006-05-19	dry	Arid_Zone_Ven	Tapa_de_Piedra	1	Haemoproteus_sp	VEN02
Melanerpes_rubricapillus	2006-05-19	dry	Arid_Zone_Ven	Tapa_de_Piedra	0	NA	NA
Synallaxis_candei	2005-03-22	dry	Arid_Zone_Ven	Médanos_de_Coro_N._P.	0	NA	NA
Synallaxis_candei	2005-03-30	dry	Arid_Zone_Ven	Los_Camazos	0	NA	NA
Synallaxis_candei	2005-05-24	dry	Arid_Zone_Ven	Los_Camazos	0	NA	NA
Synallaxis_candei	2006-05-14	dry	Arid_Zone_Ven	La_Vela_de_Coro	0	NA	NA
Synallaxis_candei	2006-05-18	dry	Arid_Zone_Ven	Coro	0	NA	NA
Synallaxis_candei	2005-07-09	rain	Arid_Zone_Ven	Banco_de_Baragua	0	NA	NA
Xiphorhynchus_picus	2004-09-18	dry	Arid_Zone_Ven	Nuevo_Unare	0	NA	NA
Xiphorhynchus_picus	2004-09-25	dry	Arid_Zone_Ven	Los_Camazos	1	NO_ID	NO_ID
Xiphorhynchus_picus	2004-10-05	dry	Arid_Zone_Ven	Península_de_Paraguaná	1	NO_ID	NO_ID
Xiphorhynchus_picus	2004-10-18	dry	Arid_Zone_Ven	La_Chica,_Margarita_Island	0	NA	NA
Xiphorhynchus_picus	2004-11-16	dry	Arid_Zone_Ven	Península_de_Paraguaná	1	NO_ID	NO_ID
Xiphorhynchus_picus	2004-12-07	rain	Arid_Zone_Ven	Murrión,_Margarita_Island	0	NA	NA
Xiphorhynchus_picus	2004-12-08	rain	Arid_Zone_Ven	Chacaracual,_Margarita_Isl	0	NA	NA
Xiphorhynchus_picus	2004-12-08	rain	Arid_Zone_Ven	Chacaracual,_Margarita_Isl	0	NA	NA
Xiphorhynchus_picus	2005-01-09	dry	Arid_Zone_Ven	Los_Camazos	1	NO_ID	NO_ID
Xiphorhynchus_picus	2005-01-10	dry	Arid_Zone_Ven	Banco_de_Baragua	0	NA	NA
Xiphorhynchus_picus	2005-01-10	dry	Arid_Zone_Ven	Banco_de_Baragua	1	NO_ID	NO_ID
Xiphorhynchus_picus	2005-01-27	dry	Arid_Zone_Ven	Península_de_Paraguaná	1	NO_ID	NO_ID
Xiphorhynchus_picus	2005-01-27	dry	Arid_Zone_Ven	Península_de_Paraguaná	1	NO_ID	NO_ID
Xiphorhynchus_picus	2005-03-18	dry	Arid_Zone_Ven	Península_de_Paraguaná	0	NA	NA
Xiphorhynchus_picus	2005-03-24	dry	Arid_Zone_Ven	Medanos_de_Coro_N._P.	1	NO_ID	NO_ID
Xiphorhynchus_picus	2005-03-25	dry	Arid_Zone_Ven	Banco_de_Baragua	0	NA	NA
Xiphorhynchus_picus	2005-04-10	dry	Arid_Zone_Ven	Jose	0	NA	NA
Xiphorhynchus_picus	2005-04-18	dry	Arid_Zone_Ven	Península_de_Araya	0	NA	NA
Xiphorhynchus_picus	2005-04-18	dry	Arid_Zone_Ven	Península_de_Araya	1	NO_ID	NO_ID
Xiphorhynchus_picus	2005-05-09	dry	Arid_Zone_Ven	Península_de_Paraguaná	0	NA	NA
Xiphorhynchus_picus	2005-05-10	dry	Arid_Zone_Ven	Península_de_Paraguaná	1	Haemoproteus_LA07GSA95_	VEN14
Xiphorhynchus_picus	2005-05-18	dry	Arid_Zone_Ven	Medanos_de_Coro_N._P.	0	NA	NA
Xiphorhynchus_picus	2005-05-19	dry	Arid_Zone_Ven	Coro	1	NO_ID	NO_ID
Xiphorhynchus_picus	2005-05-22	dry	Arid_Zone_Ven	Banco_de_Baragua	0	NA	NA
Xiphorhynchus_picus	2005-05-22	dry	Arid_Zone_Ven	Banco_de_Baragua	1	NO_ID	NO_ID
Xiphorhynchus_picus	2005-06-05	dry	Arid_Zone_Ven	Península_de_Araya	1	Haemoproteus_MEX510	VEN13
Xiphorhynchus_picus	2005-06-06	dry	Arid_Zone_Ven	Península_de_Araya	0	NA	NA
Xiphorhynchus_picus	2005-06-08	dry	Arid_Zone_Ven	Península_de_Araya	0	NA	NA
Xiphorhynchus_picus	2005-06-14	dry	Arid_Zone_Ven	La_Chica,_Margarita_Island	0	NA	NA
Xiphorhynchus_picus	2005-06-21	dry	Arid_Zone_Ven	Jose	0	NA	NA
Xiphorhynchus_picus	2005-06-21	dry	Arid_Zone_Ven	Jose	0	NA	NA
Xiphorhynchus_picus	2005-06-21	dry	Arid_Zone_Ven	Jose	1	Haemoproteus_sp	VEN02
Xiphorhynchus_picus	2005-06-21	dry	Arid_Zone_Ven	Jose	0	NA	NA
Xiphorhynchus_picus	2005-06-22	dry	Arid_Zone_Ven	Nuevo_Unare	0	NA	NA
Xiphorhynchus_picus	2005-06-27	dry	Arid_Zone_Ven	Península_de_Paraguaná	0	NA	NA
Xiphorhynchus_picus	2005-07-07	rain	Arid_Zone_Ven	Medanos_de_Coro_N._P.	0	NA	NA
Xiphorhynchus_picus	2005-07-09	rain	Arid_Zone_Ven	Coro	0	NA	NA
Xiphorhynchus_picus	2005-07-14	rain	Arid_Zone_Ven	Padre_Diego	0	NA	NA
Xiphorhynchus_picus	2005-07-17	rain	Arid_Zone_Ven	Península_de_Paraguaná	0	NA	NA
Xiphorhynchus_picus	2005-07-25	rain	Arid_Zone_Ven	Península_de_Araya	1	Haemoproteus_sp	VEN02
Xiphorhynchus_picus	2005-07-31	rain	Arid_Zone_Ven	Nuevo_Unare	0	NA	NA
Xiphorhynchus_picus	2005-07-31	rain	Arid_Zone_Ven	Jose	0	NA	NA
Xiphorhynchus_picus	2006-05-15	dry	Arid_Zone_Ven	Coro	0	NA	NA
Sakesphorus_canadensis	2006-05-14	dry	Arid_Zone_Ven	La_Vela_de_Coro	1	NO_ID	NO_ID
Sakesphorus_canadensis	2006-05-18	dry	Arid_Zone_Ven	Coro	1	NO_ID	NO_ID
Sakesphorus_canadensis	2006-05-18	dry	Arid_Zone_Ven	Coro	1	Haemoproteus_sp	VEN02
Sakesphorus_canadensis	2006-05-20	dry	Arid_Zone_Ven	Banco_de_Baragua	1	NO_ID	NO_ID
Sakesphorus_canadensis	2006-06-05	dry	Arid_Zone_Ven	Jose	0	NA	NA
Sakesphorus_canadensis	2006-06-05	dry	Arid_Zone_Ven	Jose	0	NA	NA
Sakesphorus_canadensis	2006-06-04	dry	Arid_Zone_Ven	Jose	1	NO_ID	NO_ID
Formicivora_intermedia	2004-10-18	dry	Arid_Zone_Ven	La_Chica,_Margarita_Island	0	NA	NA
Formicivora_intermedia	2006-05-16	dry	Arid_Zone_Ven	Península_de_Paraguaná	0	NA	NA
Formicivora_intermedia	2006-05-16	dry	Arid_Zone_Ven	Península_de_Paraguaná	0	NA	NA
Formicivora_intermedia	2006-05-21	dry	Arid_Zone_Ven	Banco_de_Baragua	1	Haemoproteus_sp	VEN16
Coryphospingus_pileatus	2004-10-05	dry	Arid_Zone_Ven	Península_de_Paraguaná	1	NO_ID	NO_ID
Coryphospingus_pileatus	2006-06-05	dry	Arid_Zone_Ven	Jose	1	Haemoproteus_sp__	VEN06
Coryphospingus_pileatus	2006-06-05	dry	Arid_Zone_Ven	Jose	1	Haemoproteus_sp__	VEN06
Coryphospingus_pileatus	2006-06-06	dry	Arid_Zone_Ven	Jose	1	Haemoproteus_sp__	VEN06
Elaenia_parvirostris	2006-06-04	dry	Arid_Zone_Ven	Jose	0	NA	NA
Elaenia_parvirostris	2006-06-04	dry	Arid_Zone_Ven	Jose	0	NA	NA
Elaenia_parvirostris	2006-06-05	dry	Arid_Zone_Ven	Jose	0	NA	NA
Elaenia_parvirostris	2006-06-05	dry	Arid_Zone_Ven	Jose	0	NA	NA
Elaenia_parvirostris	2006-06-05	dry	Arid_Zone_Ven	Jose	0	NA	NA
Elaenia_parvirostris	2006-06-05	dry	Arid_Zone_Ven	Jose	0	NA	NA
Elaenia_parvirostris	2006-06-05	dry	Arid_Zone_Ven	Jose	0	NA	NA
Elaenia_parvirostris	2006-06-05	dry	Arid_Zone_Ven	Jose	0	NA	NA
Elaenia_parvirostris	2006-06-06	dry	Arid_Zone_Ven	Jose	0	NA	NA
Elaenia_parvirostris	2006-06-06	dry	Arid_Zone_Ven	Jose	0	NA	NA
Elaenia_parvirostris	2006-06-06	dry	Arid_Zone_Ven	Jose	0	NA	NA
Elaenia_parvirostris	2006-06-28	dry	Arid_Zone_Ven	Jose	0	NA	NA
Elaenia_parvirostris	2006-06-28	dry	Arid_Zone_Ven	Jose	0	NA	NA
Elaenia_parvirostris	2006-06-28	dry	Arid_Zone_Ven	Jose	0	NA	NA
Elaenia_parvirostris	2006-06-28	dry	Arid_Zone_Ven	Jose	0	NA	NA
Elaenia_parvirostris	2006-06-28	dry	Arid_Zone_Ven	Jose	0	NA	NA
Elaenia_parvirostris	2006-06-29	dry	Arid_Zone_Ven	Jose	0	NA	NA
Elaenia_parvirostris	2006-06-29	dry	Arid_Zone_Ven	Jose	0	NA	NA
Elaenia_parvirostris	2006-07-29	rain	Arid_Zone_Ven	Península_de_Araya	0	NA	NA
Elaenia_parvirostris	2006-07-29	rain	Arid_Zone_Ven	Península_de_Araya	0	NA	NA
Sublegatus_arenarum	2005-01-23	dry	Arid_Zone_Ven	Península_de_Paraguaná	0	NA	NA
Sublegatus_arenarum	2005-01-27	dry	Arid_Zone_Ven	Península_de_Paraguaná	0	NA	NA
Sublegatus_arenarum	2005-01-27	dry	Arid_Zone_Ven	Península_de_Paraguaná	0	NA	NA
Sublegatus_arenarum	2005-02-10	dry	Arid_Zone_Ven	Península_de_Araya	0	NA	NA
Sublegatus_arenarum	2005-02-24	dry	Arid_Zone_Ven	Nuevo_Unare_	0	NA	NA
Sublegatus_arenarum	2005-03-17	dry	Arid_Zone_Ven	Médanos_de_Coro_N._P.	1	NO_ID	NO_ID
Sublegatus_arenarum	2005-03-23	dry	Arid_Zone_Ven	Médanos_de_Coro_N._P.	0	NA	NA
Sublegatus_arenarum	2005-04-09	dry	Arid_Zone_Ven	Clarines	1	NO_ID	NO_ID
Sublegatus_arenarum	2005-04-19	dry	Arid_Zone_Ven	Península_de_Araya	0	NA	NA
Sublegatus_arenarum	2005-04-28	dry	Arid_Zone_Ven	La_Chica,_Margarita_Island	1	NO_ID	NO_ID
Sublegatus_arenarum	2005-05-10	dry	Arid_Zone_Ven	Península_de_Paraguaná	0	NA	NA
Sublegatus_arenarum	2005-05-10	dry	Arid_Zone_Ven	Península_de_Paraguaná	1	NO_ID	NO_ID
Sublegatus_arenarum	2005-05-10	dry	Arid_Zone_Ven	Península_de_Paraguaná	0	NA	NA
Sublegatus_arenarum	2005-05-16	dry	Arid_Zone_Ven	Médanos_de_Coro_N._P.	1	Plasmodium_J169ILE	VEN07
Sublegatus_arenarum	2005-05-16	dry	Arid_Zone_Ven	Médanos_de_Coro_N._P.	0	NA	NA
Sublegatus_arenarum	2005-05-22	dry	Arid_Zone_Ven	Banco_de_Baragua	0	NA	NA
Sublegatus_arenarum	2005-06-06	dry	Arid_Zone_Ven	Península_de_Araya	1	NO_ID	NO_ID
Sublegatus_arenarum	2005-07-17	rain	Arid_Zone_Ven	Península_de_Paraguaná	0	NA	NA
Sublegatus_arenarum	2005-07-17	rain	Arid_Zone_Ven	Península_de_Paraguaná	0	NA	NA
Sublegatus_arenarum	2006-05-14	dry	Arid_Zone_Ven	La_Vela	1	NO_ID	NO_ID
Sublegatus_arenarum	2006-05-15	dry	Arid_Zone_Ven	Coro	0	NA	NA
Sublegatus_arenarum	2006-05-16	dry	Arid_Zone_Ven	Península_de_Paraguaná	0	NA	NA
Sublegatus_arenarum	2006-05-20	dry	Arid_Zone_Ven	Banco_de_Baragua	0	NA	NA
Sublegatus_arenarum	2006-06-29	dry	Arid_Zone_Ven	Jose	0	NA	NA
Sublegatus_arenarum	2006-07-28	rain	Arid_Zone_Ven	Península_de_Araya	1	Plasmodium_sp._GHOW3489_	VEN17
Mimus_gilvus	2004-10-06	dry	Arid_Zone_Ven	Península_de_Paraguaná	1	Haemoproteus_sp__	VEN04
Mimus_gilvus	2004-10-18	dry	Arid_Zone_Ven	La_Chica,_Margarita_Island	1	NO_ID	NO_ID
Mimus_gilvus	2004-10-25	dry	Arid_Zone_Ven	Península_de_Araya	0	NA	NA
Mimus_gilvus	2004-11-20	dry	Arid_Zone_Ven	Coro_	0	NA	NA
Mimus_gilvus	2004-12-20	rain	Arid_Zone_Ven	Nuevo_Unare	0	NA	NA
Mimus_gilvus	2005-04-18	dry	Arid_Zone_Ven	Península_de_Araya	1	Haemoproteus_sp__	VEN05
Mimus_gilvus	2005-04-18	dry	Arid_Zone_Ven	Península_de_Araya	1	Haemoproteus_sp__	VEN04
Mimus_gilvus	2005-04-19	dry	Arid_Zone_Ven	Península_de_Araya	1	Haemoproteus_sp__	VEN04
Mimus_gilvus	2005-04-29	dry	Arid_Zone_Ven	Comejen,_Margarita_Island	1	Haemoproteus_sp__	VEN04
Mimus_gilvus	2005-04-29	dry	Arid_Zone_Ven	Comejen,_Margarita_Island	1	NO_ID	NO_ID
Mimus_gilvus	2005-05-11	dry	Arid_Zone_Ven	Península_de_Paraguaná	1	Haemoproteus_sp__	VEN04
Mimus_gilvus	2005-05-11	dry	Arid_Zone_Ven	Península_de_Paraguaná	1	Haemoproteus_sp__	VEN05
Mimus_gilvus	2005-05-11	dry	Arid_Zone_Ven	Península_de_Paraguaná	1	Haemoproteus_sp__	VEN04
Mimus_gilvus	2005-05-11	dry	Arid_Zone_Ven	Península_de_Paraguaná	0	NA	NA
Mimus_gilvus	2005-05-12	dry	Arid_Zone_Ven	Península_de_Paraguaná	1	Haemoproteus_sp__	VEN05
Mimus_gilvus	2005-05-16	dry	Arid_Zone_Ven	Coro_	1	NO_ID	NO_ID
Mimus_gilvus	2005-05-16	dry	Arid_Zone_Ven	Médanos_de_Coro_N._P.	0	NA	NA
Mimus_gilvus	2005-05-22	dry	Arid_Zone_Ven	Banco_de_Baragua	1	NO_ID	NO_ID
Mimus_gilvus	2005-05-23	dry	Arid_Zone_Ven	Banco_de_Baragua	1	Haemoproteus_sp__	VEN05
Mimus_gilvus	2005-06-05	dry	Arid_Zone_Ven	Península_de_Araya	1	NO_ID	NO_ID
Mimus_gilvus	2005-06-05	dry	Arid_Zone_Ven	Península_de_Araya	1	Haemoproteus_sp__	VEN05
Mimus_gilvus	2005-06-06	dry	Arid_Zone_Ven	Península_de_Araya	1	NO_ID	NO_ID
Mimus_gilvus	2005-06-08	dry	Arid_Zone_Ven	Península_de_Araya	1	Haemoproteus_sp__	VEN04
Mimus_gilvus	2005-06-21	dry	Arid_Zone_Ven	Jose	1	Haemoproteus_sp__	VEN04
Mimus_gilvus	2005-06-21	dry	Arid_Zone_Ven	Jose	1	Plasmodium_sp._haplotype_64_	VEN01
Mimus_gilvus	2005-06-22	dry	Arid_Zone_Ven	Nuevo_Unare	1	Plasmodium_sp._haplotype_64_	VEN01
Mimus_gilvus	2005-06-22	dry	Arid_Zone_Ven	Nuevo_Unare	1	Plasmodium_sp._haplotype_64_	VEN01
Mimus_gilvus	2005-06-22	dry	Arid_Zone_Ven	Nuevo_Unare	1	NO_ID	NO_ID
Mimus_gilvus	2005-06-22	dry	Arid_Zone_Ven	Nuevo_Unare	1	Haemoproteus_MEX510	VEN13
Mimus_gilvus	2005-06-27	dry	Arid_Zone_Ven	Coro_	1	Plasmodium__JA07J725_	VEN15
Mimus_gilvus	2005-06-27	dry	Arid_Zone_Ven	Península_de_Paraguaná	1	NO_ID	NO_ID
Mimus_gilvus	2005-06-27	dry	Arid_Zone_Ven	Península_de_Paraguaná	1	Haemoproteus_sp__	VEN04
Mimus_gilvus	2005-07-07	rain	Arid_Zone_Ven	Médanos_de_Coro_N._P.	1	Haemoproteus_sp__	VEN04
Mimus_gilvus	2005-07-07	rain	Arid_Zone_Ven	Médanos_de_Coro_N._P.	1	Haemoproteus_MEX510	VEN13
Mimus_gilvus	2005-07-09	rain	Arid_Zone_Ven	Coro_	1	NO_ID	NO_ID
Mimus_gilvus	2005-07-14	rain	Arid_Zone_Ven	Padre_Diego	1	Haemoproteus_sp__	VEN05
Mimus_gilvus	2005-07-14	rain	Arid_Zone_Ven	Padre_Diego	1	Haemoproteus_sp__	VEN04
Mimus_gilvus	2005-07-17	rain	Arid_Zone_Ven	Península_de_Paraguaná	1	NO_ID	NO_ID
Mimus_gilvus	2005-07-25	rain	Arid_Zone_Ven	Península_de_Araya	1	NO_ID	NO_ID
Mimus_gilvus	2005-08-07	rain	Arid_Zone_Ven	El_Indio,_Margarita_Island	1	Haemoproteus_sp__	VEN04
Mimus_gilvus	2006-05-14	dry	Arid_Zone_Ven	La_Vela_de_Coro	0	NA	NA
Mimus_gilvus	2006-05-15	dry	Arid_Zone_Ven	Coro_	1	Haemoproteus_MEX510	VEN13
Mimus_gilvus	2006-05-19	dry	Arid_Zone_Ven	Banco_de_Baragua	1	Haemoproteus_sp__	VEN04
Mimus_gilvus	2006-06-28	dry	Arid_Zone_Ven	Jose	1	NO_ID	NO_ID
Mimus_gilvus	2006-06-28	dry	Arid_Zone_Ven	Jose	1	Haemoproteus_MEX510	VEN13
Mimus_gilvus	2006-06-28	dry	Arid_Zone_Ven	Jose	0	NA	NA
Mimus_gilvus	2006-06-28	dry	Arid_Zone_Ven	Jose	0	NA	NA
Mimus_gilvus	2006-06-29	dry	Arid_Zone_Ven	Jose	1	NO_ID	NO_ID
Mimus_gilvus	2006-06-29	dry	Arid_Zone_Ven	Jose	1	NO_ID	NO_ID
Mimus_gilvus	2006-06-29	dry	Arid_Zone_Ven	Jose	1	Plasmodium_sp._haplotype_64_	VEN01
Mimus_gilvus	2006-07-28	rain	Arid_Zone_Ven	Península_de_Araya	1	Plasmodium_sp._haplotype_64_	VEN01
Coereba_flaveola	2006-05-15	dry	Arid_Zone_Ven	La_Zabila	0	NA	NA
Coereba_flaveola	2006-05-16	dry	Arid_Zone_Ven	Península_de_Paraguaná	0	NA	NA
Coereba_flaveola	2006-05-16	dry	Arid_Zone_Ven	Península_de_Paraguaná	0	NA	NA
Coereba_flaveola	2006-05-16	dry	Arid_Zone_Ven	Península_de_Paraguaná	0	NA	NA
Coereba_flaveola	2006-05-16	dry	Arid_Zone_Ven	Península_de_Paraguaná	0	NA	NA
Coereba_flaveola	2006-05-19	dry	Arid_Zone_Ven	Tapa_de_Piedra	0	NA	NA
Coereba_flaveola	2006-06-04	dry	Arid_Zone_Ven	Jose	0	NA	NA
Coereba_flaveola	2006-06-05	dry	Arid_Zone_Ven	Jose	0	NA	NA
Coereba_flaveola	2006-06-06	dry	Arid_Zone_Ven	Jose	0	NA	NA
Coereba_flaveola	2006-06-29	dry	Arid_Zone_Ven	Jose	0	NA	NA
Coereba_flaveola	2006-06-29	dry	Arid_Zone_Ven	Jose	0	NA	NA
Coereba_flaveola	2006-07-28	rain	Arid_Zone_Ven	Península_de_Araya	0	NA	NA
Coereba_flaveola	2006-07-28	rain	Arid_Zone_Ven	Península_de_Araya	0	NA	NA
Coereba_flaveola	2006-07-28	rain	Arid_Zone_Ven	Península_de_Araya	0	NA	NA
Coereba_flaveola	2006-07-28	rain	Arid_Zone_Ven	Península_de_Araya	0	NA	NA
Coereba_flaveola	2006-07-28	rain	Arid_Zone_Ven	Península_de_Araya	0	NA	NA
Coereba_flaveola	2006-07-29	rain	Arid_Zone_Ven	Península_de_Araya	0	NA	NA
Coereba_flaveola	2006-07-29	rain	Arid_Zone_Ven	Península_de_Araya	0	NA	NA
Thraupis_glaucocolpa	2005-12-27	rain	Arid_Zone_Ven	Guacuco,_Margarita_Island	0	NA	NA
Thraupis_glaucocolpa	2005-12-28	rain	Arid_Zone_Ven	Guacuco,_Margarita_Island	0	NA	NA
Thraupis_glaucocolpa	2005-12-28	rain	Arid_Zone_Ven	Guacuco,_Margarita_Island	0	NA	NA
Thraupis_glaucocolpa	2005-12-28	rain	Arid_Zone_Ven	Guacuco,_Margarita_Island	0	NA	NA
Thraupis_glaucocolpa	2006-06-04	dry	Arid_Zone_Ven	Jose	1	Plasmodium_sp.	VEN09
Thraupis_glaucocolpa	2006-06-05	dry	Arid_Zone_Ven	Jose	1	Haemoproteus_sp	VEN02
Thraupis_glaucocolpa	2006-06-05	dry	Arid_Zone_Ven	Jose	0	NA	NA
Thraupis_glaucocolpa	2006-06-28	dry	Arid_Zone_Ven	Jose	0	NA	NA
Thraupis_glaucocolpa	2006-06-28	dry	Arid_Zone_Ven	Jose	1	NO_ID	NO_ID
Thraupis_glaucocolpa	2006-06-29	dry	Arid_Zone_Ven	Jose	1	NO_ID	NO_ID
Thraupis_glaucocolpa	2006-07-29	rain	Arid_Zone_Ven	Península_de_Araya	1	Plasmodium_sp.	VEN08
Saltator_coerulescens	2005-05-10	dry	Arid_Zone_Ven	Península_de_Paraguaná	0	NA	NA
Saltator_coerulescens	2005-05-16	dry	Arid_Zone_Ven	Médanos_de_Coro_N._P._	0	NA	NA
Saltator_coerulescens	2005-05-18	dry	Arid_Zone_Ven	Médanos_de_Coro_N._P._	1	Haemoproteus_sp	VEN02
Saltator_coerulescens	2005-06-22	dry	Arid_Zone_Ven	Nuevo_Unare	0	NA	NA
Saltator_coerulescens	2005-06-26	dry	Arid_Zone_Ven	Península_de_Paraguaná	0	NA	NA
Saltator_coerulescens	2005-06-26	dry	Arid_Zone_Ven	Península_de_Paraguaná	0	NA	NA
Saltator_coerulescens	2005-07-17	rain	Arid_Zone_Ven	Península_de_Paraguaná	0	NA	NA
Saltator_coerulescens	2006-05-16	dry	Arid_Zone_Ven	Península_de_Paraguaná	0	NA	NA
Saltator_coerulescens	2006-05-16	dry	Arid_Zone_Ven	Península_de_Paraguaná	0	NA	NA
Saltator_coerulescens	2006-07-28	rain	Arid_Zone_Ven	Península_de_Araya	1	NO_ID	NO_ID
Saltator_coerulescens	2006-07-28	rain	Arid_Zone_Ven	Península_de_Araya	0	NA	NA
Saltator_orenocensis	2004-11-28	dry	Arid_Zone_Ven	Los_Camazos	0	NA	NA
Saltator_orenocensis	2004-11-28	dry	Arid_Zone_Ven	Los_Camazos	0	NA	NA
Saltator_orenocensis	2005-03-11	dry	Arid_Zone_Ven	Coro	1	Haemoproteus_sp	VEN16
Saltator_orenocensis	2005-03-25	dry	Arid_Zone_Ven	Banco_de_Baragua	1	NO_ID	NO_ID
Saltator_orenocensis	2005-03-30	dry	Arid_Zone_Ven	Los_Camazos	0	NA	NA
Saltator_orenocensis	2005-04-09	dry	Arid_Zone_Ven	Clarines	0	NA	NA
Saltator_orenocensis	2005-05-16	dry	Arid_Zone_Ven	Coro	0	NA	NA
Saltator_orenocensis	2005-05-16	dry	Arid_Zone_Ven	Coro	1	NO_ID	NO_ID
Saltator_orenocensis	2005-05-16	dry	Arid_Zone_Ven	Coro	0	NA	NA
Saltator_orenocensis	2005-06-27	dry	Arid_Zone_Ven	Coro	0	NA	NA
Saltator_orenocensis	2006-05-19	dry	Arid_Zone_Ven	Banco_de_Baragua	0	NA	NA
Saltator_orenocensis	2006-05-19	dry	Arid_Zone_Ven	Banco_de_Baragua	0	NA	NA
Saltator_orenocensis	2006-05-20	dry	Arid_Zone_Ven	Banco_de_Baragua	0	NA	NA
Icterus_nigrogularis	2005-04-28	dry	Arid_Zone_Ven	La_Chica,_Margarita_Island	1	Haemoproteus_sp	VEN02
Icterus_nigrogularis	2005-05-11	dry	Arid_Zone_Ven	Península_de_Paraguaná	1	Plasmodium_sp.	VEN09
Icterus_nigrogularis	2005-05-16	dry	Arid_Zone_Ven	Médanos_de_Coro_N._P.	1	Haemoproteus_sp	VEN02
Icterus_nigrogularis	2005-05-22	dry	Arid_Zone_Ven	Banco_de_Baragua	1	Haemoproteus_OZ06J420_	VEN03
Icterus_nigrogularis	2005-05-22	dry	Arid_Zone_Ven	Banco_de_Baragua	1	Haemoproteus_sp	VEN02
Icterus_nigrogularis	2005-05-23	dry	Arid_Zone_Ven	Padre_Diego	1	NO_ID	NO_ID
Icterus_nigrogularis	2005-05-23	dry	Arid_Zone_Ven	Padre_Diego	1	Haemoproteus_sp	VEN02
Icterus_nigrogularis	2005-06-22	dry	Arid_Zone_Ven	Nuevo_Unare	1	Haemoproteus_sp	VEN02
Icterus_nigrogularis	2005-07-12	rain	Arid_Zone_Ven	Banco_de_Baragua	1	Haemoproteus_sp	VEN02
Icterus_nigrogularis	2005-07-14	rain	Arid_Zone_Ven	Padre_Diego	1	Haemoproteus_sp	VEN02
Icterus_nigrogularis	2005-12-27	rain	Arid_Zone_Ven	Guacuco,_Margarita_Island	1	Haemoproteus_sp	VEN02
Icterus_nigrogularis	2006-05-14	dry	Arid_Zone_Ven	La_Vela	1	Haemoproteus_sp	VEN02
Icterus_nigrogularis	2006-05-19	dry	Arid_Zone_Ven	Banco_de_Baragua	1	Haemoproteus_sp	VEN02
Icterus_nigrogularis	2006-05-20	dry	Arid_Zone_Ven	Banco_de_Baragua	1	Haemoproteus_sp	VEN02
Icterus_nigrogularis	2006-05-20	dry	Arid_Zone_Ven	Banco_de_Baragua	1	Haemoproteus_sp	VEN02
Icterus_nigrogularis	2006-05-20	dry	Arid_Zone_Ven	Banco_de_Baragua	1	Haemoproteus_sp	VEN02
Icterus_nigrogularis	2006-05-20	dry	Arid_Zone_Ven	Banco_de_Baragua	1	Haemoproteus_OZ06J420_	VEN03
Icterus_nigrogularis	2006-05-20	dry	Arid_Zone_Ven	Banco_de_Baragua	1	Haemoproteus_OZ06J420_	VEN03
Icterus_nigrogularis	2006-06-28	dry	Arid_Zone_Ven	Jose	1	Haemoproteus_OZ06J420_	VEN03
Icterus_icterus	2005-05-23	dry	Arid_Zone_Ven	Banco_de_Baragua	1	Haemoproteus_sp	VEN02
Icterus_icterus	2005-05-24	dry	Arid_Zone_Ven	Los_Camazos	1	Haemoproteus_sp	VEN02
Icterus_icterus	2005-06-26	dry	Arid_Zone_Ven	Península_de_Paraguaná	0	NA	NA
Icterus_icterus	2005-07-12	rain	Arid_Zone_Ven	Banco_de_Baragua	0	NA	NA
Icterus_icterus	2005-07-16	rain	Arid_Zone_Ven	Península_de_Paraguaná	1	Haemoproteus_sp	VEN02
Icterus_icterus	2006-05-15	dry	Arid_Zone_Ven	Coro	0	NA	NA
Tiaris_bicolor	24/10/2004	dry	Arid_Zone_Ven	AP1-05	1	Haemoproteus_sp.	VEN12
Tiaris_bicolor	24/10/2004	dry	Arid_Zone_Ven	AP1-05	0	NA	NA
Tiaris_bicolor	24/10/2004	dry	Arid_Zone_Ven	AP1-05	0	NA	NA
Tiaris_bicolor	25/10/2004	dry	Arid_Zone_Ven	AP1-05	0	NA	NA
Tiaris_bicolor	2004-12-14	rain	Arid_Zone_Ven	AP1-08	0	NA	NA
Tiaris_bicolor	2004-12-14	rain	Arid_Zone_Ven	AP1-08	0	NA	NA
Tiaris_bicolor	16/12/2004	rain	Arid_Zone_Ven	Guarapo	1	NO_ID	NO_ID
Tiaris_bicolor	16/12/2004	rain	Arid_Zone_Ven	Guarapo	0	NA	NA
Tiaris_bicolor	16/12/2004	rain	Arid_Zone_Ven	Guarapo	1	NO_ID	NO_ID
Tiaris_bicolor	16/12/2004	rain	Arid_Zone_Ven	Guarapo	0	NA	NA
Tiaris_bicolor	2005-02-10	dry	Arid_Zone_Ven	AP1-05	0	NA	NA
Tiaris_bicolor	2005-02-10	dry	Arid_Zone_Ven	AP1-05	0	NA	NA
Tiaris_bicolor	2005-02-10	dry	Arid_Zone_Ven	AP1-05	0	NA	NA
Tiaris_bicolor	2005-02-11	dry	Arid_Zone_Ven	AP1-08	1	NO_ID	NO_ID
Tiaris_bicolor	2005-02-11	dry	Arid_Zone_Ven	AP1-08	1	NO_ID	NO_ID
Tiaris_bicolor	2005-02-11	dry	Arid_Zone_Ven	AP1-08	1	NO_ID	NO_ID
Tiaris_bicolor	2005-04-18	dry	Arid_Zone_Ven	AP2-05	0	NA	NA
Tiaris_bicolor	2005-04-18	dry	Arid_Zone_Ven	AP1-05	0	NA	NA
Tiaris_bicolor	2005-06-06	dry	Arid_Zone_Ven	AP3-07	0	NA	NA
Tiaris_bicolor	2005-06-08	dry	Arid_Zone_Ven	La_Alegria	0	NA	NA
Tiaris_bicolor	2005-06-08	dry	Arid_Zone_Ven	La_Alegria	0	NA	NA
Tiaris_bicolor	2005-07-25	rain	Arid_Zone_Ven	AP3-01	0	NA	NA
Tiaris_bicolor	2005-07-28	rain	Arid_Zone_Ven	El_Cerezal	0	NA	NA
Tiaris_bicolor	29/07/2006	rain	Arid_Zone_Ven	Guamachal	0	NA	NA
Tiaris_bicolor	2004-12-20	rain	Arid_Zone_Ven	CP1-06	0	NA	NA
Tiaris_bicolor	2004-12-20	rain	Arid_Zone_Ven	CP1-06	1	NO_ID	NO_ID
Tiaris_bicolor	2004-12-20	rain	Arid_Zone_Ven	CP1-06	0	NA	NA
Tiaris_bicolor	2005-02-20	dry	Arid_Zone_Ven	CP3-09	1	Haemoproteus_sp__	VEN06
Tiaris_bicolor	2005-02-21	dry	Arid_Zone_Ven	CP3-09	1	NO_ID	NO_ID
Tiaris_bicolor	2005-02-21	dry	Arid_Zone_Ven	CP3-09	0	NA	NA
Tiaris_bicolor	2005-02-21	dry	Arid_Zone_Ven	CP3-09	0	NA	NA
Tiaris_bicolor	2005-02-21	dry	Arid_Zone_Ven	CP3-09	1	Haemoproteus_sp._haplotype_7_	VEN11
Tiaris_bicolor	2005-02-24	dry	Arid_Zone_Ven	CP1-02	0	NA	NA
Tiaris_bicolor	2005-02-24	dry	Arid_Zone_Ven	CP1-02	0	NA	NA
Tiaris_bicolor	2005-02-24	dry	Arid_Zone_Ven	CP1-02	0	NA	NA
Tiaris_bicolor	2005-02-24	dry	Arid_Zone_Ven	CP1-02	0	NA	NA
Tiaris_bicolor	2005-02-24	dry	Arid_Zone_Ven	CP1-02	0	NA	NA
Tiaris_bicolor	2005-04-09	dry	Arid_Zone_Ven	CP2-02	0	NA	NA
Tiaris_bicolor	2005-04-09	dry	Arid_Zone_Ven	CP2-02	0	NA	NA
Tiaris_bicolor	2005-04-09	dry	Arid_Zone_Ven	CP3-06	0	NA	NA
Tiaris_bicolor	2005-04-10	dry	Arid_Zone_Ven	CP3-06	0	NA	NA
Tiaris_bicolor	2005-04-10	dry	Arid_Zone_Ven	CP3-06	1	NO_ID	NO_ID
Tiaris_bicolor	2005-04-10	dry	Arid_Zone_Ven	CP3-06	0	NA	NA
Tiaris_bicolor	2005-04-10	dry	Arid_Zone_Ven	CP3-06	1	NO_ID	NO_ID
Tiaris_bicolor	2005-04-10	dry	Arid_Zone_Ven	CP3-06	0	NA	NA
Tiaris_bicolor	2005-04-10	dry	Arid_Zone_Ven	CP3-06	0	NA	NA
Tiaris_bicolor	2005-04-10	dry	Arid_Zone_Ven	CP3-06	0	NA	NA
Tiaris_bicolor	2005-04-10	dry	Arid_Zone_Ven	CP3-06	0	NA	NA
Tiaris_bicolor	2005-04-10	dry	Arid_Zone_Ven	CP3-06	0	NA	NA
Tiaris_bicolor	2005-06-21	dry	Arid_Zone_Ven	Opuesto_a_CP3-05	0	NA	NA
Tiaris_bicolor	2005-07-29	rain	Arid_Zone_Ven	Opuesto_a_CP3-05	0	NA	NA
Tiaris_bicolor	2005-07-30	rain	Arid_Zone_Ven	Opuesto_a_CP3-05	0	NA	NA
Tiaris_bicolor	2006-06-05	dry	Arid_Zone_Ven	CP3-09	0	NA	NA
Tiaris_bicolor	2006-06-28	dry	Arid_Zone_Ven	CP3-Restinga	0	NA	NA
Tiaris_bicolor	2006-06-28	dry	Arid_Zone_Ven	CP3-Restinga	1	NO_ID	NO_ID
Tiaris_bicolor	2005-03-11	dry	Arid_Zone_Ven	FL2-04	0	NA	NA
Tiaris_bicolor	2005-03-11	dry	Arid_Zone_Ven	FL2-04	1	Plasmodium_sp.	VEN08
Tiaris_bicolor	2005-03-11	dry	Arid_Zone_Ven	FL2-04	1	NO_ID	NO_ID
Tiaris_bicolor	2005-05-17	dry	Arid_Zone_Ven	FL2-04	0	NA	NA
Tiaris_bicolor	18/05/2006	dry	Arid_Zone_Ven	FL2-Frente_Virgen	0	NA	NA
Tiaris_bicolor	2004-09-24	dry	Arid_Zone_Ven	LL1-06	1	NO_ID	NO_ID
Tiaris_bicolor	2004-09-24	dry	Arid_Zone_Ven	LL1-06	0	NA	NA
Tiaris_bicolor	2004-09-24	dry	Arid_Zone_Ven	LL1-06	0	NA	NA
Tiaris_bicolor	2004-09-25	dry	Arid_Zone_Ven	LL1-06	0	NA	NA
Tiaris_bicolor	2004-09-25	dry	Arid_Zone_Ven	LL1-06	0	NA	NA
Tiaris_bicolor	2004-09-25	dry	Arid_Zone_Ven	LL1-06	0	NA	NA
Tiaris_bicolor	2004-09-25	dry	Arid_Zone_Ven	LL1-06	0	NA	NA
Tiaris_bicolor	2004-11-27	dry	Arid_Zone_Ven	LL1-05	0	NA	NA
Tiaris_bicolor	2005-01-08	dry	Arid_Zone_Ven	LL1-06	0	NA	NA
Tiaris_bicolor	2005-01-08	dry	Arid_Zone_Ven	LL1-06	1	NO_ID	NO_ID
Tiaris_bicolor	2005-01-09	dry	Arid_Zone_Ven	LL1-06	0	NA	NA
Tiaris_bicolor	2005-01-09	dry	Arid_Zone_Ven	LL1-06	1	NO_ID	NO_ID
Tiaris_bicolor	2005-01-09	dry	Arid_Zone_Ven	LL1-06	0	NA	NA
Tiaris_bicolor	2005-01-10	dry	Arid_Zone_Ven	LL2-05	0	NA	NA
Tiaris_bicolor	2005-01-10	dry	Arid_Zone_Ven	LL2-05	1	NO_ID	NO_ID
Tiaris_bicolor	2005-03-25	dry	Arid_Zone_Ven	LL2-05	0	NA	NA
Tiaris_bicolor	2005-03-25	dry	Arid_Zone_Ven	LL2-05	1	Haemoproteus_sp._haplotype_7_	VEN11
Tiaris_bicolor	2005-03-27	dry	Arid_Zone_Ven	LL1-10	1	NO_ID	NO_ID
Tiaris_bicolor	2005-03-27	dry	Arid_Zone_Ven	LL1-10	1	Haemoproteus_sp._haplotype_7_	VEN11
Tiaris_bicolor	2005-03-27	dry	Arid_Zone_Ven	LL1-10	0	NA	NA
Tiaris_bicolor	2005-03-30	dry	Arid_Zone_Ven	LL1-05	0	NA	NA
Tiaris_bicolor	2005-03-30	dry	Arid_Zone_Ven	LL1-05	1	NO_ID	NO_ID
Tiaris_bicolor	2005-03-30	dry	Arid_Zone_Ven	LL1-05	0	NA	NA
Tiaris_bicolor	2005-03-30	dry	Arid_Zone_Ven	LL1-05	0	NA	NA
Tiaris_bicolor	2005-05-26	dry	Arid_Zone_Ven	Tapa_de_Piedra	0	NA	NA
Tiaris_bicolor	19/05/2006	dry	Arid_Zone_Ven	Tapa_de_Piedra	1	NO_ID	NO_ID
Tiaris_bicolor	20/05/2006	dry	Arid_Zone_Ven	Cerca_LL2-06	1	Haemoproteus_sp._haplotype_7_	VEN11
Tiaris_bicolor	20/05/2006	dry	Arid_Zone_Ven	Cerca_LL2-06	0	NA	NA
Tiaris_bicolor	20/05/2006	dry	Arid_Zone_Ven	Cerca_LL2-06	0	NA	NA
Tiaris_bicolor	2004-10-18	dry	Arid_Zone_Ven	La_Chica_afuera	0	NA	NA
Tiaris_bicolor	2005-12-07	rain	Arid_Zone_Ven	MP3-01	1	NO_ID	NO_ID
Tiaris_bicolor	2005-12-08	rain	Arid_Zone_Ven	MP3-01	0	NA	NA
Tiaris_bicolor	2005-12-08	rain	Arid_Zone_Ven	MP3-01	0	NA	NA
Tiaris_bicolor	2005-12-08	rain	Arid_Zone_Ven	MP3-01	0	NA	NA
Tiaris_bicolor	2005-12-08	rain	Arid_Zone_Ven	MP3-01	0	NA	NA
Tiaris_bicolor	2005-12-08	rain	Arid_Zone_Ven	MP3-01	0	NA	NA
Tiaris_bicolor	17/02/2005	dry	Arid_Zone_Ven	MP1-07	1	Haemoproteus_sp._haplotype_7_	VEN11
Tiaris_bicolor	18/02/2005	dry	Arid_Zone_Ven	MP3-01	0	NA	NA
Tiaris_bicolor	18/02/2006	dry	Arid_Zone_Ven	MP3-01	0	NA	NA
Tiaris_bicolor	2005-02-19	dry	Arid_Zone_Ven	MP3-01	0	NA	NA
Tiaris_bicolor	2005-02-19	dry	Arid_Zone_Ven	MP3-01	1	Haemoproteus_sp._haplotype_7_	VEN11
Tiaris_bicolor	2005-02-19	dry	Arid_Zone_Ven	MP3-01	1	NO_ID	NO_ID
Tiaris_bicolor	2005-02-19	dry	Arid_Zone_Ven	MP3-01	1	Haemoproteus_sp.	VEN12
Tiaris_bicolor	2005-04-27	dry	Arid_Zone_Ven	MP1-09	0	NA	NA
Tiaris_bicolor	2005-04-27	dry	Arid_Zone_Ven	La_Chica_afuera	0	NA	NA
Tiaris_bicolor	2005-04-28	dry	Arid_Zone_Ven	La_Chica_afuera	0	NA	NA
Tiaris_bicolor	2005-04-28	dry	Arid_Zone_Ven	La_Chica_afuera	0	NA	NA
Tiaris_bicolor	2005-04-29	dry	Arid_Zone_Ven	MP1-01	0	NA	NA
Tiaris_bicolor	2005-06-13	dry	Arid_Zone_Ven	MP2-04	0	NA	NA
Tiaris_bicolor	2005-06-14	dry	Arid_Zone_Ven	La_Chica_adentro	0	NA	NA
Tiaris_bicolor	27/12/2005	rain	Arid_Zone_Ven	Guacuco	0	NA	NA
Tiaris_bicolor	27/12/2005	rain	Arid_Zone_Ven	Guacuco	0	NA	NA
Tiaris_bicolor	27/12/2005	rain	Arid_Zone_Ven	Guacuco	0	NA	NA
Tiaris_bicolor	28/12/2005	rain	Arid_Zone_Ven	Guacuco	0	NA	NA
Tiaris_bicolor	2004-10-06	dry	Arid_Zone_Ven	PP3-05	0	NA	NA
Tiaris_bicolor	2004-10-06	dry	Arid_Zone_Ven	PP3-05	0	NA	NA
Tiaris_bicolor	2004-10-06	dry	Arid_Zone_Ven	PP3-05	0	NA	NA
Tiaris_bicolor	2004-10-06	dry	Arid_Zone_Ven	PP3-05	0	NA	NA
Tiaris_bicolor	2004-10-06	dry	Arid_Zone_Ven	PP3-05	0	NA	NA
Tiaris_bicolor	27/01/2005	dry	Arid_Zone_Ven	PP2-05	0	NA	NA
Tiaris_bicolor	22/03/2005	dry	Arid_Zone_Ven	PP3-05	0	NA	NA
Tiaris_bicolor	2005-05-09	dry	Arid_Zone_Ven	PP1-05	0	NA	NA
Tiaris_bicolor	2005-05-10	dry	Arid_Zone_Ven	PP1-05	0	NA	NA
Tiaris_bicolor	2005-05-10	dry	Arid_Zone_Ven	PP1-05	0	NA	NA
Tiaris_bicolor	2005-05-10	dry	Arid_Zone_Ven	PP2-05	0	NA	NA
Tiaris_bicolor	2005-05-11	dry	Arid_Zone_Ven	PP1-01	0	NA	NA
Tiaris_bicolor	2005-05-11	dry	Arid_Zone_Ven	PP1-01	0	NA	NA
Tiaris_bicolor	2005-05-11	dry	Arid_Zone_Ven	PP1-01	0	NA	NA
Tiaris_bicolor	2005-06-26	dry	Arid_Zone_Ven	PP2-05	0	NA	NA
Tiaris_bicolor	2005-07-17	rain	Arid_Zone_Ven	PP2-09	0	NA	NA
Tiaris_bicolor	16/05/2006	dry	Arid_Zone_Ven	PP2-09	0	NA	NA
Tiaris_bicolor	16/05/2006	dry	Arid_Zone_Ven	PP2-09	0	NA	NA
Tiaris_bicolor	16/05/2006	dry	Arid_Zone_Ven	Cerro_Santa_Ana	0	NA	NA
Tiaris_bicolor	2006-06-09	dry	Arid_Zone_Ven	Santa_Paula	0	NA	NA
Tiaris_bicolor	2006-06-09	dry	Arid_Zone_Ven	Santa_Paula	0	NA	NA
Tiaris_bicolor	2006-06-09	dry	Arid_Zone_Ven	Santa_Paula	0	NA	NA
Tiaris_bicolor	2006-06-09	dry	Arid_Zone_Ven	Santa_Paula	0	NA	NA
Tiaris_bicolor	2006-06-09	dry	Arid_Zone_Ven	Santa_Paula	0	NA	NA
Tiaris_bicolor	2006-06-09	dry	Arid_Zone_Ven	Santa_Paula	0	NA	NA
Tiaris_bicolor	2006-06-09	dry	Arid_Zone_Ven	Santa_Paula	0	NA	NA
Tiaris_bicolor	2006-06-09	dry	Arid_Zone_Ven	Santa_Paula	0	NA	NA
Tiaris_bicolor		NA	Arid_Zone_Ven	Araya_Peninsula	1	Haemoproteus_sp	VEN02
Tiaris_bicolor		NA	Arid_Zone_Ven	Araya_Peninsula	1	Haemoproteus_sp	VEN02
Tiaris_bicolor		NA	Arid_Zone_Ven	Araya_Peninsula	1	Haemoproteus_sp	VEN02
Tiaris_bicolor		NA	Arid_Zone_Ven	Araya_Peninsula	1	Haemoproteus_sp	VEN02
Tiaris_bicolor		NA	Arid_Zone_Ven	Araya_Peninsula	1	Haemoproteus_sp	VEN02
Tiaris_bicolor		NA	Arid_Zone_Ven	Araya_Peninsula	1	Haemoproteus_sp	VEN02
Tiaris_bicolor		NA	Arid_Zone_Ven	Araya_Peninsula	1	Haemoproteus_sp	VEN02
Tiaris_bicolor		NA	Arid_Zone_Ven	Araya_Peninsula	1	Haemoproteus_sp	VEN02
Tiaris_bicolor		NA	Arid_Zone_Ven	Araya_Peninsula	1	Haemoproteus_sp	VEN02
Tiaris_bicolor		NA	Arid_Zone_Ven	Araya_Peninsula	1	Haemoproteus_sp	VEN02
Tiaris_bicolor		NA	Arid_Zone_Ven	Araya_Peninsula	1	Haemoproteus_sp	VEN02
Tiaris_bicolor		NA	Arid_Zone_Ven	Araya_Peninsula	1	Haemoproteus_sp	VEN02
Tiaris_bicolor		NA	Arid_Zone_Ven	Araya_Peninsula	1	Haemoproteus_sp	VEN02
Tiaris_bicolor		NA	Arid_Zone_Ven	Falcon_lowlands	1	Haemoproteus_sp	VEN02
Tiaris_bicolor		NA	Arid_Zone_Ven	Falcon_lowlands	1	Haemoproteus_sp	VEN02
Tiaris_bicolor		NA	Arid_Zone_Ven	Falcon_lowlands	1	Haemoproteus_sp	VEN02
Tiaris_bicolor		NA	Arid_Zone_Ven	Falcon_lowlands	1	Haemoproteus_sp	VEN02
Tiaris_bicolor		NA	Arid_Zone_Ven	Falcon_lowlands	1	Haemoproteus_sp	VEN02
Tiaris_bicolor		NA	Arid_Zone_Ven	Falcon_lowlands	0	NA	NA
Cardinalis_phoenicus	2005-02-10	dry	Arid_Zone_Ven	AP1-05	0	NA	NA
Cardinalis_phoenicus	2005-02-10	dry	Arid_Zone_Ven	AP1-05	1	Haemoproteus_sp	VEN02
Cardinalis_phoenicus	2005-02-11	dry	Arid_Zone_Ven	AP1-08	1	NO_ID	NO_ID
Cardinalis_phoenicus	2005-02-11	dry	Arid_Zone_Ven	AP1-08	1	Haemoproteus_sp	VEN02
Cardinalis_phoenicus	2005-04-19	dry	Arid_Zone_Ven	La_Alegria	0	NA	NA
Cardinalis_phoenicus	2005-06-08	dry	Arid_Zone_Ven	La_Alegria	1	Haemoproteus_sp	VEN02
Cardinalis_phoenicus	2005-06-08	dry	Arid_Zone_Ven	La_Alegria	0	NA	NA
Cardinalis_phoenicus	2005-07-27	rain	Arid_Zone_Ven	Cerezal	1	Haemoproteus_sp	VEN02
Cardinalis_phoenicus	28/07/2006	rain	Arid_Zone_Ven	Guamachal	1	Haemoproteus_sp	VEN02
Cardinalis_phoenicus	28/07/2006	rain	Arid_Zone_Ven	Guamachal	1	Haemoproteus_sp	VEN02
Cardinalis_phoenicus	29/07/2006	rain	Arid_Zone_Ven	Guamachal	1	Haemoproteus_sp	VEN02
Cardinalis_phoenicus	2005-02-21	dry	Arid_Zone_Ven	CP3-09	0	NA	NA
Cardinalis_phoenicus	2005-02-21	dry	Arid_Zone_Ven	CP3-09	1	NO_ID	NO_ID
Cardinalis_phoenicus	2005-06-22	dry	Arid_Zone_Ven	CP1-02	1	NO_ID	NO_ID
Cardinalis_phoenicus	2005-06-04	dry	Arid_Zone_Ven	CP3-09	1	NO_ID	NO_ID
Cardinalis_phoenicus	2005-06-05	dry	Arid_Zone_Ven	CP3-09	1	Plasmodium_sp.	VEN10
Cardinalis_phoenicus	2005-06-08	dry	Arid_Zone_Ven	CP3_(captivity)	0	NA	NA
Cardinalis_phoenicus	2005-06-29	dry	Arid_Zone_Ven	CP3-08	1	NO_ID	NO_ID
Cardinalis_phoenicus	2004-09-30	dry	Arid_Zone_Ven	FL3-03	0	NA	NA
Cardinalis_phoenicus	2004-09-30	dry	Arid_Zone_Ven	FL3-03	0	NA	NA
Cardinalis_phoenicus	2005-05-17	dry	Arid_Zone_Ven	FL2-04	1	Haemoproteus_sp	VEN02
Cardinalis_phoenicus	2005-05-18	dry	Arid_Zone_Ven	FL1-10	1	Haemoproteus_sp	VEN02
Cardinalis_phoenicus	2005-05-18	dry	Arid_Zone_Ven	FL1-10	1	Haemoproteus_sp	VEN02
Cardinalis_phoenicus	2005-05-18	dry	Arid_Zone_Ven	FL1-10	1	NO_ID	NO_ID
Cardinalis_phoenicus	2005-06-27	dry	Arid_Zone_Ven	FL2-08	1	NO_ID	NO_ID
Cardinalis_phoenicus	2005-06-28	dry	Arid_Zone_Ven	FL2-08	0	NA	NA
Cardinalis_phoenicus	2005-07-09	rain	Arid_Zone_Ven	FL2-04	0	NA	NA
Cardinalis_phoenicus	2005-07-09	rain	Arid_Zone_Ven	FL3-La_Zabila	1	Haemoproteus_sp	VEN02
Cardinalis_phoenicus	14/05/2006	dry	Arid_Zone_Ven	FL-El_Carrizal/La_Vela	1	Haemoproteus_sp	VEN02
Cardinalis_phoenicus	14/05/2006	dry	Arid_Zone_Ven	FL-El_Carrizal/La_Vela	1	Haemoproteus_sp	VEN02
Cardinalis_phoenicus	14/05/2006	dry	Arid_Zone_Ven	FL-El_Carrizal/La_Vela	1	Haemoproteus_sp	VEN02
Cardinalis_phoenicus	18/05/2006	dry	Arid_Zone_Ven	FL2-Frente_Virgen	0	NA	NA
Cardinalis_phoenicus	18/05/2006	dry	Arid_Zone_Ven	FL2-Frente_Virgen	0	NA	NA
Cardinalis_phoenicus	2004-11-26	dry	Arid_Zone_Ven	LL1-05	0	NA	NA
Cardinalis_phoenicus	2005-05-23	dry	Arid_Zone_Ven	LL1-05	1	Haemoproteus_sp	VEN02
Cardinalis_phoenicus	2005-05-23	dry	Arid_Zone_Ven	LL1-05	0	NA	NA
Cardinalis_phoenicus	2005-05-24	dry	Arid_Zone_Ven	LL1-05	0	NA	NA
Cardinalis_phoenicus	2005-05-24	dry	Arid_Zone_Ven	LL1-10	1	Haemoproteus_sp	VEN02
Cardinalis_phoenicus	2005-05-25	dry	Arid_Zone_Ven	LL1-10	1	Haemoproteus_sp	VEN02
Cardinalis_phoenicus	2005-05-26	dry	Arid_Zone_Ven	Tapa_de_Piedra	1	Haemoproteus_sp	VEN02
Cardinalis_phoenicus	2005-07-12	rain	Arid_Zone_Ven	LL2-10	1	Haemoproteus_sp	VEN02
Cardinalis_phoenicus	2004-10-18	dry	Arid_Zone_Ven	La_Chica_afuera	1	Haemoproteus_sp	VEN02
Cardinalis_phoenicus	2004-10-18	dry	Arid_Zone_Ven	La_Chica_afuera	0	NA	NA
Cardinalis_phoenicus	2004-12-07	rain	Arid_Zone_Ven	MP2-07	1	Haemoproteus_sp	VEN02
Cardinalis_phoenicus	2004-12-07	rain	Arid_Zone_Ven	MP2-07	0	NA	NA
Cardinalis_phoenicus	2004-12-07	rain	Arid_Zone_Ven	MP2-07	0	NA	NA
Cardinalis_phoenicus	2004-12-07	rain	Arid_Zone_Ven	MP2-07	0	NA	NA
Cardinalis_phoenicus	2004-12-08	rain	Arid_Zone_Ven	MP3-01	0	NA	NA
Cardinalis_phoenicus	2005-04-26	dry	Arid_Zone_Ven	MP1-09	1	NO_ID	NO_ID
Cardinalis_phoenicus	2005-04-27	dry	Arid_Zone_Ven	MP1-09	1	Haemoproteus_sp	VEN02
Cardinalis_phoenicus	2005-04-27	dry	Arid_Zone_Ven	MP1-09	1	Haemoproteus_sp	VEN02
Cardinalis_phoenicus	2005-04-28	dry	Arid_Zone_Ven	La_Chica_afuera	1	Haemoproteus_sp	VEN02
Cardinalis_phoenicus	2005-04-28	dry	Arid_Zone_Ven	La_Chica_afuera	0	NA	NA
Cardinalis_phoenicus	2005-04-28	dry	Arid_Zone_Ven	La_Chica_afuera	1	Haemoproteus_sp	VEN02
Cardinalis_phoenicus	2005-04-28	dry	Arid_Zone_Ven	La_Chica_afuera	1	Haemoproteus_sp	VEN02
Cardinalis_phoenicus	2005-04-29	dry	Arid_Zone_Ven	MP1-01	1	Haemoproteus_sp	VEN02
Cardinalis_phoenicus	2005-04-29	dry	Arid_Zone_Ven	MP1-01	1	Haemoproteus_sp	VEN02
Cardinalis_phoenicus	2005-04-29	dry	Arid_Zone_Ven	MP1-01	1	Haemoproteus_sp	VEN02
Cardinalis_phoenicus	2005-06-13	dry	Arid_Zone_Ven	MP2-04	1	Haemoproteus_sp	VEN02
Cardinalis_phoenicus	2005-06-14	dry	Arid_Zone_Ven	La_Chica_adentro	1	Haemoproteus_sp	VEN02
Cardinalis_phoenicus	2005-08-05	rain	Arid_Zone_Ven	MP2-07	1	Haemoproteus_sp	VEN02
Cardinalis_phoenicus	2005-08-05	rain	Arid_Zone_Ven	MP2-07	1	Haemoproteus_sp	VEN02
Cardinalis_phoenicus	2005-08-05	rain	Arid_Zone_Ven	MP2-07	1	Haemoproteus_sp	VEN02
Cardinalis_phoenicus	2005-08-07	rain	Arid_Zone_Ven	El_Indio	1	Haemoproteus_sp	VEN02
Cardinalis_phoenicus	2005-08-07	rain	Arid_Zone_Ven	El_Indio	1	Haemoproteus_sp	VEN02
Cardinalis_phoenicus	28/12/2005	rain	Arid_Zone_Ven	Guacuco	0	NA	NA
Cardinalis_phoenicus	28/12/2005	rain	Arid_Zone_Ven	Guacuco	1	NO_ID	NO_ID
Cardinalis_phoenicus	2004-11-15	dry	Arid_Zone_Ven	PP3-08	1	Haemoproteus_sp	VEN02
Cardinalis_phoenicus	2004-11-15	dry	Arid_Zone_Ven	PP3-08	1	NO_ID	NO_ID
Cardinalis_phoenicus	2005-01-27	dry	Arid_Zone_Ven	PP2-05	1	Haemoproteus_sp	VEN02
Cardinalis_phoenicus	2005-01-27	dry	Arid_Zone_Ven	PP2-05	1	NO_ID	NO_ID
Cardinalis_phoenicus	2005-03-22	dry	Arid_Zone_Ven	PP3-05	1	Haemoproteus_sp	VEN02
Cardinalis_phoenicus	2005-03-22	dry	Arid_Zone_Ven	PP3-05	1	Haemoproteus_sp	VEN02
Cardinalis_phoenicus	2005-05-10	dry	Arid_Zone_Ven	PP1-05	1	Haemoproteus_sp	VEN02
Cardinalis_phoenicus	2005-05-11	dry	Arid_Zone_Ven	PP2-05	1	Haemoproteus_sp	VEN02
Cardinalis_phoenicus	2005-05-11	dry	Arid_Zone_Ven	PP1-01	1	NO_ID	NO_ID
Cardinalis_phoenicus	2005-06-26	dry	Arid_Zone_Ven	PP2-10	1	NO_ID	NO_ID
Cardinalis_phoenicus	2005-06-27	dry	Arid_Zone_Ven	Cerro_Sta._Ana	1	NO_ID	NO_ID
Cardinalis_phoenicus	2005-07-17	rain	Arid_Zone_Ven	PP2-09	1	NO_ID	NO_ID
Cardinalis_phoenicus	16/05/2006	dry	Arid_Zone_Ven	PP2-09	1	Haemoproteus_sp	VEN02
Cardinalis_phoenicus		NA	Arid_Zone_Ven		1	Haemoproteus_sp	VEN02
Cardinalis_phoenicus		NA	Arid_Zone_Ven		1	Haemoproteus_sp	VEN02
Cardinalis_phoenicus		NA	Arid_Zone_Ven		1	Haemoproteus_sp	VEN02
Cardinalis_phoenicus		NA	Arid_Zone_Ven		1	Plasmodium_sp	VEN08
Cardinalis_phoenicus		NA	Arid_Zone_Ven		1	Plasmodium_sp	VEN10
Cardinalis_phoenicus		NA	Arid_Zone_Ven		1	Haemoproteus_sp._	VEN12
Leucippus_fallax	24/10/2004	dry	Arid_Zone_Ven	AP1-05	0	NA	NA
Leucippus_fallax	14/12/2004	rain	Arid_Zone_Ven	AP1-08	0	NA	NA
Leucippus_fallax	2005-02-10	dry	Arid_Zone_Ven	AP1-05	0	NA	NA
Leucippus_fallax	2005-02-10	dry	Arid_Zone_Ven	AP1-05	0	NA	NA
Leucippus_fallax	28/07/2006	rain	Arid_Zone_Ven	CP1-06	0	NA	NA
Leucippus_fallax	28/07/2006	rain	Arid_Zone_Ven	FL2-07	0	NA	NA
Leucippus_fallax	28/07/2006	rain	Arid_Zone_Ven	FL2-08	0	NA	NA
Leucippus_fallax	28/07/2006	rain	Arid_Zone_Ven	FL2-08	0	NA	NA
Leucippus_fallax	2004-09-18	dry	Arid_Zone_Ven	FL3-02	0	NA	NA
Leucippus_fallax	2005-02-21	dry	Arid_Zone_Ven	FL3-02	0	NA	NA
Leucippus_fallax	2005-02-21	dry	Arid_Zone_Ven	FL3-La_Zabila	0	NA	NA
Leucippus_fallax	2005-02-23	dry	Arid_Zone_Ven	LL1-06	0	NA	NA
Leucippus_fallax	2005-02-23	dry	Arid_Zone_Ven	LL1-05	0	NA	NA
Leucippus_fallax	2005-04-08	dry	Arid_Zone_Ven	MP2-07	0	NA	NA
Leucippus_fallax	2005-04-08	dry	Arid_Zone_Ven	MP2-07	0	NA	NA
Leucippus_fallax	2005-07-29	rain	Arid_Zone_Ven	MP3-01	0	NA	NA
Leucippus_fallax	2004-12-20	rain	Arid_Zone_Ven	MP3-01	0	NA	NA
Leucippus_fallax	2006-06-05	dry	Arid_Zone_Ven	MP3-01	0	NA	NA
Leucippus_fallax	2006-06-05	dry	Arid_Zone_Ven	Guacuco	0	NA	NA
Leucippus_fallax	2006-06-05	dry	Arid_Zone_Ven	PP3-08	0	NA	NA
Leucippus_fallax	2006-06-05	dry	Arid_Zone_Ven	PP3-05	0	NA	NA
Leucippus_fallax	2006-06-05	dry	Arid_Zone_Ven	PP2-05	0	NA	NA
Amazonas_barbadensis	2006-07-06	rain	Arid_Zone_Ven	Jose	0	NA	NA
Amazonas_barbadensis	2005-05-15	dry	Arid_Zone_Ven	Pedregal	0	NA	NA
Amazonas_barbadensis	2005-05-15	dry	Arid_Zone_Ven	Pedregal	0	NA	NA
Amazonas_barbadensis	2005-05-16	dry	Arid_Zone_Ven	La_Negrita	0	NA	NA
Amazonas_barbadensis	2005-05-18	dry	Arid_Zone_Ven	Pedregal	0	NA	NA
Amazonas_barbadensis	2005-06-12	dry	Arid_Zone_Ven	La_Vieja,_introducido_en_La_Chica	0	NA	NA
Amazonas_barbadensis	2005-06-12	dry	Arid_Zone_Ven	La_Chica,_Nido_El_Angel	0	NA	NA
Amazonas_barbadensis	2005-06-12	dry	Arid_Zone_Ven	La_Chica,_Nido_Detras_del_Bajito	0	NA	NA
Amazonas_barbadensis	2005-06-12	dry	Arid_Zone_Ven	La_Chica,_Nido_Detras_del_Raspiño	0	NA	NA
Amazonas_barbadensis	2005-06-12	dry	Arid_Zone_Ven	La_Chica,_Nido_Alto	0	NA	NA
Amazonas_barbadensis	2005-06-12	dry	Arid_Zone_Ven	La_Chica,_Nido_Silver	0	NA	NA
Amazonas_barbadensis	2005-06-12	dry	Arid_Zone_Ven	La_Chica,_Nido_El_Cartucho	0	NA	NA
Amazonas_barbadensis	2005-06-12	dry	Arid_Zone_Ven	La_Chica,_Nido_Observadero_Guayacan	0	NA	NA
Amazonas_barbadensis	2005-06-12	dry	Arid_Zone_Ven	La_Chica,_Nido_Quebrajacho_Rodolfo	0	NA	NA
Amazonas_barbadensis	2005-06-13	dry	Arid_Zone_Ven	La_Chica,_Nido_La_Foto	0	NA	NA
Amazonas_barbadensis	2005-06-13	dry	Arid_Zone_Ven	La_Chica,_introducido_en_La_Foto	0	NA	NA
Amazonas_barbadensis	2005-06-13	dry	Arid_Zone_Ven	La_Chica,_Nido_Delante_Mata_Mara	0	NA	NA
Amazonas_barbadensis	2005-06-13	dry	Arid_Zone_Ven	La_Chica,_Nido_Conuco_de_Morocho	0	NA	NA
Amazonas_barbadensis	2005-06-13	dry	Arid_Zone_Ven	La_Chica,_Nido_Detras_Casita_La_Chica	0	NA	NA
Amazonas_barbadensis	2005-06-13	dry	Arid_Zone_Ven	La_Chica,_Nido_Marvin_II	0	NA	NA
Sittasomus_griseicapillus	01/03/2007	rain	Cerrado	UA	0	NA	NA
Volatinia_jacarina	05/02/2006	rain	Cerrado	SPC	0	NA	NA
Machaeropterus_pyrocephalus	05/02/2006	rain	Cerrado	SPC	0	NA	NA
Ramphocelus_carbo	16/08/2009	dry	Cerrado	UA	1	NO_ID	NO_ID
Ramphocelus_carbo	16/08/2009	dry	Cerrado	UA	1	NO_ID	NO_ID
Poecilotriccus_fumifrons	29/10/2007	dry	Cerrado	SPC	0	NA	NA
Phaeomyias_murina	17/06/2007	dry	Cerrado	SPL	0	NA	NA
Leptopogon_amaurocephalus	29/10/2007	dry	Cerrado	SPC	0	NA	NA
Phaeomyias_murina	17/06/2007	dry	Cerrado	SPL	0	NA	NA
Coereba_flaveola	29/10/2007	rain	Cerrado	SPC	0	NA	NA
Lathrotriccus_euleri	29/10/2007	dry	Cerrado	SPC	1	NO_ID	NO_ID
Pipra_fasciicauda	29/10/2007	dry	Cerrado	SPC	0	NA	NA
Pipra_fasciicauda	29/10/2007	dry	Cerrado	SPC	1	NO_ID	NO_ID
Pipra_fasciicauda	29/10/2007	rain	Cerrado	SPC	0	NA	NA
Pipra_fasciicauda	29/10/2007	rain	Cerrado	SPC	0	NA	NA
Dacnis_cayana	29/10/2007	dry	Cerrado	SPC	0	NA	NA
Pipra_fasciicauda	29/10/2007	rain	Cerrado	SPC	0	NA	NA
Coereba_flaveola	19/04/2007	rain	Cerrado	SPC	0	NA	NA
Formicivora_grisea	29/10/2007	dry	Cerrado	SPC	0	NA	NA
Tachyphonus_cristatus	29/10/2007	dry	Cerrado	SPC	1	Plasmodium_sp	TOC-15
Myrmotherula_axillaris	29/10/2007	dry	Cerrado	SPC	1	NO_ID	NO_ID
Myrmotherula_axillaris	29/10/2007	dry	Cerrado	SPC	1	NO_ID	NO_ID
Myiarchus_tuberculifer	29/10/2007	dry	Cerrado	SPC	0	NA	NA
Myiopagis_viridicata	29/10/2007	dry	Cerrado	SPC	1	Plasmodium_sp	TOC-14
Pipra_fasciicauda	29/10/2007	rain	Cerrado	SPC	1	Haemoproteus_sp.	TOC-8
Myiopagis_caniceps	29/10/2007	dry	Cerrado	SPC	0	NA	NA
Pipra_fasciicauda	29/10/2007	dry	Cerrado	SPC	0	NA	NA
Pipra_fasciicauda	29/10/2007	dry	Cerrado	SPC	1	NO_ID	NO_ID
Pipra_fasciicauda	29/10/2007	rain	Cerrado	SPC	0	NA	NA
Pipra_fasciicauda	29/10/2007	rain	Cerrado	SPC	0	NA	NA
Coereba_flaveola	29/10/2007	rain	Cerrado	SPC	1	Haemoproteus_sp.	TOC-2
Myiopagis_gaimardii	29/10/2007	dry	Cerrado	SPC	1	Plasmodium_sp	TOC-4
Pipra_fasciicauda	29/10/2007	rain	Cerrado	SPC	0	NA	NA
Coereba_flaveola	29/10/2007	rain	Cerrado	SPC	0	NA	NA
Coereba_flaveola	29/10/2007	dry	Cerrado	SPC	0	NA	NA
Galbula_ruficauda	29/10/2007	dry	Cerrado	SPC	1	NO_ID	NO_ID
Vireo_olivaceus	29/10/2007	dry	Cerrado	SPC	0	NA	NA
Picumnus_albosquamatus	29/10/2007	dry	Cerrado	SPC	0	NA	NA
Empidonomus_varius	29/10/2007	dry	Cerrado	SPC	0	NA	NA
Arremon_taciturnus	29/10/2007	dry	Cerrado	SPC	0	NA	NA
Corythopis_torquatus	29/10/2007	dry	Cerrado	SPC	0	NA	NA
Corythopis_torquatus	29/10/2007	dry	Cerrado	SPC	1	NO_ID	NO_ID
Myiozetetes_cayanensis	29/10/2007	dry	Cerrado	SPC	1	NO_ID	NO_ID
Myiozetetes_cayanensis	29/10/2007	dry	Cerrado	SPC	0	NA	NA
Myiozetetes_cayanensis	29/10/2007	dry	Cerrado	SPC	1	NO_ID	NO_ID
Tachyphonus_cristatus	29/10/2007	dry	Cerrado	SPC	0	NA	NA
Formicivora_grisea	29/10/2007	dry	Cerrado	SPC	1	Plasmodium_sp	TOC-25
Picumnus_albosquamatus	29/10/2007	dry	Cerrado	SPC	1	Haemoproteus_sp.	TOC-2
Pipra_fasciicauda	29/10/2007	dry	Cerrado	SPC	0	NA	NA
Pheugopedius_genibarbis	16/08/2009	dry	Cerrado	UA	1	NO_ID	NO_ID
Pipra_fasciicauda	29/10/2007	dry	Cerrado	SPC	0	NA	NA
Hylophilus_pectoralis	29/10/2007	dry	Cerrado	SPC	0	NA	NA
Nyctidromus_albicollis	29/10/2007	dry	Cerrado	SPC	1	NO_ID	NO_ID
Nyctidromus_albicollis	29/10/2007	dry	Cerrado	SPC	1	NO_ID	NO_ID
Thraupis_palmarum	29/10/2007	dry	Cerrado	SPC	0	NA	NA
Saltator_maximus	29/10/2007	dry	Cerrado	SPC	1	NO_ID	NO_ID
Saltator_maximus	29/10/2007	rain	Cerrado	SPC	0	NA	NA
Cacicus_cela	29/10/2007	dry	Cerrado	SPC	1	NO_ID	NO_ID
Cacicus_cela	29/10/2007	rain	Cerrado	SPC	1	NO_ID	NO_ID
Cacicus_cela	29/10/2007	dry	Cerrado	SPC	1	NO_ID	NO_ID
Cacicus_cela	29/10/2007	dry	Cerrado	SPC	1	Plasmodium_sp	TOC-10
Cacicus_cela	29/10/2007	dry	Cerrado	SPC	1	NO_ID	NO_ID
Cacicus_cela	29/10/2007	dry	Cerrado	SPC	1	Plasmodium_sp	TOC-15
Cacicus_cela	29/10/2007	dry	Cerrado	SPC	1	Plasmodium_sp	TOC-15
Hemitriccus_margaritaceiventer	22/03/2008	rain	Cerrado	SPL	0	NA	NA
Camptostoma_obsoletum	22/03/2008	rain	Cerrado	SPL	0	NA	NA
Myiophobus_fasciatus	22/03/2008	rain	Cerrado	SPL	1	NO_ID	NO_ID
Hemitriccus_margaritaceiventer	18/10/2008	rain	Cerrado	UA	0	NA	NA
Hemitriccus_margaritaceiventer	18/10/2008	rain	Cerrado	UA	1	NO_ID	NO_ID
Phaeomyias_murina	20/10/2007	rain	Cerrado	SPL	0	NA	NA
Camptostoma_obsoletum	18/10/2008	rain	Cerrado	UA	0	NA	NA
Hemitriccus_margaritaceiventer	25/10/2008	rain	Cerrado	UA	0	NA	NA
Euscarthmus_meloryphus	25/10/2008	rain	Cerrado	UA	0	NA	NA
Volatinia_jacarina	21/06/2009	dry	Cerrado	UA	1	Plasmodium_sp	TOC-32
Sittasomus_griseicapillus	08/08/2009	dry	Cerrado	UA	1	NO_ID	NO_ID
Sittasomus_griseicapillus	16/08/2009	dry	Cerrado	UA	1	NO_ID	NO_ID
Phaeomyias_murina	29/10/2007	dry	Cerrado	SPC	1	NO_ID	NO_ID
Pipra_fasciicauda	23/06/2009	dry	Cerrado	UA	0	NA	NA
Manacus_manacus	04/02/2006	rain	Cerrado	SPC	0	NA	NA
Sittasomus_griseicapillus	16/02/2006	rain	Cerrado	UA	1	NO_ID	NO_ID
Cacicus_cela	29/10/2007	dry	Cerrado	SPC	0	NA	NA
Pipra_fasciicauda	27/04/2006	rain	Cerrado	UA	0	NA	NA
Lathrotriccus_euleri	27/04/2006	rain	Cerrado	UA	0	NA	NA
Basileuterus_flaveolus	27/04/2006	rain	Cerrado	UA	0	NA	NA
Turdus_leucomelas	27/04/2006	rain	Cerrado	UA	1	NO_ID	NO_ID
Turdus_leucomelas	27/04/2006	rain	Cerrado	UA	1	NO_ID	NO_ID
Vireo_olivaceus	26/11/2006	rain	Cerrado	SPL	1	NO_ID	NO_ID
Pipra_fasciicauda	01/03/2007	dry	Cerrado	SPL	0	NA	NA
Elaenia_cristata	26/11/2006	rain	Cerrado	SPL	0	NA	NA
Myiophobus_fasciatus	25/10/1008	rain	Cerrado	UA	0	NA	NA
Lathrotriccus_euleri	25/08/2006	dry	Cerrado	UA	0	NA	NA
Galbula_ruficauda	25/08/2006	dry	Cerrado	UA	0	NA	NA
Monasa_nigrifrons	25/08/2006	dry	Cerrado	UA	1	NO_ID	NO_ID
Myiophobus_fasciatus	24/09/2006	dry	Cerrado	SPL	1	Haemoproteus_sp.	TOC-26
Troglodytes_musculus	24/09/2006	dry	Cerrado	SPL	0	NA	NA
Basileuterus_culicivorus	24/09/2006	dry	Cerrado	SPL	0	NA	NA
Basileuterus_culicivorus	24/09/2006	dry	Cerrado	SPL	0	NA	NA
Basileuterus_culicivorus	24/09/2006	dry	Cerrado	SPL	0	NA	NA
Sporophila_angolensis	24/09/2006	dry	Cerrado	SPL	1	NO_ID	NO_ID
Elaenia_chiriquensis	24/09/2006	dry	Cerrado	SPL	1	NO_ID	NO_ID
Elaenia_chiriquensis	24/09/2006	dry	Cerrado	SPL	1	NO_ID	NO_ID
Elaenia_flavogaster	24/09/2006	dry	Cerrado	SPL	0	NA	NA
Elaenia_chiriquensis	24/09/2006	dry	Cerrado	SPL	0	NA	NA
Elaenia_cristata	24/09/2006	dry	Cerrado	SPL	1	NO_ID	NO_ID
Elaenia_chiriquensis	24/09/2006	dry	Cerrado	SPL	0	NA	NA
Euphonia_chlorotica	24/09/2006	dry	Cerrado	SPL	0	NA	NA
Troglodytes_musculus	24/09/2006	dry	Cerrado	SPL	0	NA	NA
Elaenia_chiriquensis	24/09/2006	dry	Cerrado	SPL	0	NA	NA
Antilophia_galeata	24/09/2006	dry	Cerrado	SPL	1	NO_ID	NO_ID
Thamnophilus_torquatus	24/09/2006	dry	Cerrado	SPL	0	NA	NA
Thamnophilus_torquatus	24/09/2006	dry	Cerrado	SPL	0	NA	NA
Lepidocolaptes_angustirostris	24/09/2006	dry	Cerrado	SPL	0	NA	NA
Cyclarhis_gujanensis	24/09/2006	dry	Cerrado	SPL	1	NO_ID	NO_ID
Myiarchus_ferox	24/09/2006	dry	Cerrado	SPL	1	NO_ID	NO_ID
Myiarchus_swainsoni	24/09/2006	dry	Cerrado	SPL	0	NA	NA
Turdus_leucomelas	24/09/2006	dry	Cerrado	SPL	1	Plasmodium_sp	TOC-9
Tyrannus_melancholicus	24/09/2006	dry	Cerrado	SPL	0	NA	NA
Thraupis_sayaca	24/09/2006	dry	Cerrado	SPL	0	NA	NA
Pipra_fasciicauda	01/03/2007	rain	Cerrado	UA	0	NA	NA
Myiarchus_swainsoni	24/09/2006	dry	Cerrado	SPL	1	NO_ID	NO_ID
Tyrannus_melancholicus	24/09/2006	dry	Cerrado	SPL	1	Haemoproteus_sp.	TOC-20
Mimus_saturninus	24/09/2006	dry	Cerrado	SPL	0	NA	NA
Turdus_leucomelas	24/09/2006	dry	Cerrado	SPL	1	NO_ID	NO_ID
Hemitriccus_margaritaceiventer	22/03/2008	rain	Cerrado	SPL	1	Haemoproteus_sp.	TOC-1
Saltator_atricollis	24/09/2006	dry	Cerrado	SPL	1	Plasmodium_sp	TOC-19
Basileuterus_culicivorus	23/05/2006	dry	Cerrado	UA	0	NA	NA
Pipra_fasciicauda	23/05/2006	dry	Cerrado	UA	1	Plasmodium_sp	TOC-4
Pipra_fasciicauda	23/05/2006	dry	Cerrado	UA	1	NO_ID	NO_ID
Hypocnemoides_maculicauda	23/03/2006	rain	Cerrado	UA	0	NA	NA
Hypocnemoides_maculicauda	23/03/2006	rain	Cerrado	UA	0	NA	NA
Hypocnemoides_maculicauda	23/03/2006	rain	Cerrado	UA	0	NA	NA
Hypocnemoides_maculicauda	23/03/2006	rain	Cerrado	UA	0	NA	NA
Nystalus_chacuru	22/07/2006	dry	Cerrado	SPL	1	NO_ID	NO_ID
Basileuterus_culicivorus	22/06/2006	dry	Cerrado	UA	1	NO_ID	NO_ID
Basileuterus_culicivorus	22/06/2006	dry	Cerrado	UA	1	NO_ID	NO_ID
Turdus_leucomelas	22/06/2006	dry	Cerrado	UA	1	NO_ID	NO_ID
Thraupis_palmarum	22/06/2006	dry	Cerrado	UA	0	NA	NA
Volatinia_jacarina	21/10/2007	dry	Cerrado	SPL	1	NO_ID	NO_ID
Vireo_olivaceus	21/10/2007	dry	Cerrado	SPL	1	NO_ID	NO_ID
Elaenia_cristata	21/10/2007	dry	Cerrado	SPL	1	Haemoproteus_sp.	TOC-3
Volatinia_jacarina	21/10/2007	dry	Cerrado	SPL	0	NA	NA
Volatinia_jacarina	21/10/2007	dry	Cerrado	SPL	0	NA	NA
Volatinia_jacarina	21/10/2007	dry	Cerrado	SPL	0	NA	NA
Basileuterus_hypoleucus	21/10/2007	dry	Cerrado	SPL	0	NA	NA
Volatinia_jacarina	21/10/2007	dry	Cerrado	SPL	0	NA	NA
Dacnis_cayana	21/10/2007	dry	Cerrado	SPL	1	Haemoproteus_sp.	TOC-5
Vireo_olivaceus	21/10/2007	dry	Cerrado	SPL	1	NO_ID	NO_ID
Vireo_olivaceus	21/10/2007	dry	Cerrado	SPL	1	Plasmodium_sp	TOC-15
Galbula_ruficauda	21/10/2007	dry	Cerrado	SPL	0	NA	NA
Gnorimopsar_chopi	21/10/2007	dry	Cerrado	SPL	1	Haemoproteus_sp.	TOC-29
Gnorimopsar_chopi	21/10/2007	dry	Cerrado	SPL	1	NO_ID	NO_ID
Pipra_fasciicauda	19/04/2007	rain	Cerrado	SPC	1	Haemoproteus_sp.	TOC-2
Gnorimopsar_chopi	21/10/2007	dry	Cerrado	SPL	1	NO_ID	NO_ID
Saltator_atricollis	21/10/2007	dry	Cerrado	SPL	1	NO_ID	NO_ID
Saltator_maximus	21/04/2006	rain	Cerrado	UA	0	NA	NA
Hylophilus_pectoralis	21/03/2007	rain	Cerrado	UA	1	Plasmodium_sp	TOC-21
Pipra_fasciicauda	21/03/2007	rain	Cerrado	UA	1	Haemoproteus_sp.	TOC-8
Volatinia_jacarina	20/10/2007	rain	Cerrado	SPL	0	NA	NA
Myiophobus_fasciatus	20/10/2007	rain	Cerrado	SPL	0	NA	NA
Volatinia_jacarina	20/10/2007	rain	Cerrado	SPL	0	NA	NA
Hemitriccus_margaritaceiventer	20/10/2007	rain	Cerrado	SPL	0	NA	NA
Volatinia_jacarina	20/10/2007	rain	Cerrado	SPL	0	NA	NA
Euscarthmus_meloryphus	20/10/2007	rain	Cerrado	SPL	1	NO_ID	NO_ID
Volatinia_jacarina	20/10/2007	rain	Cerrado	SPL	1	NO_ID	NO_ID
Elaenia_chiriquensis	20/10/2007	dry	Cerrado	SPL	1	NO_ID	NO_ID
Elaenia_chiriquensis	20/10/2007	dry	Cerrado	SPL	1	NO_ID	NO_ID
Elaenia_chiriquensis	20/10/2007	dry	Cerrado	SPL	0	NA	NA
Elaenia_chiriquensis	20/10/2007	dry	Cerrado	SPL	0	NA	NA
Elaenia_chiriquensis	20/10/2007	dry	Cerrado	SPL	0	NA	NA
Elaenia_chiriquensis	20/10/2007	dry	Cerrado	SPL	1	Plasmodium_sp	TOC-15
Formicivora_rufa	20/10/2007	dry	Cerrado	SPL	0	NA	NA
Elaenia_parvirostris	20/10/2007	dry	Cerrado	SPL	0	NA	NA
Elaenia_flavogaster	20/10/2007	dry	Cerrado	SPL	0	NA	NA
Elaenia_chiriquensis	20/10/2007	dry	Cerrado	SPL	1	NO_ID	NO_ID
Volatinia_jacarina	20/10/2007	dry	Cerrado	SPL	0	NA	NA
Volatinia_jacarina	20/10/2007	dry	Cerrado	SPL	0	NA	NA
Elaenia_cristata	20/10/2007	dry	Cerrado	SPL	1	NO_ID	NO_ID
Elaenia_flavogaster	20/10/2007	dry	Cerrado	SPL	0	NA	NA
Thamnophilus_torquatus	20/10/2007	dry	Cerrado	SPL	1	Plasmodium_sp	TOC-10
Thamnophilus_torquatus	20/10/2007	dry	Cerrado	SPL	0	NA	NA
Pipra_fasciicauda	20/04/2008	rain	Cerrado	SPC	0	NA	NA
Formicivora_grisea	20/04/2008	rain	Cerrado	SPC	0	NA	NA
Poecilotriccus_fumifrons	20/04/2008	rain	Cerrado	SPC	0	NA	NA
Dacnis_cayana	19/08/2006	dry	Cerrado	SPL	0	NA	NA
Pipra_fasciicauda	18/05/2006	dry	Cerrado	UA	1	NO_ID	NO_ID
Manacus_manacus	18/05/2006	dry	Cerrado	UA	0	NA	NA
Pipra_fasciicauda	18/05/2006	dry	Cerrado	UA	0	NA	NA
Galbula_ruficauda	18/05/2006	dry	Cerrado	UA	1	NO_ID	NO_ID
Lathrotriccus_euleri	17/06/2007	dry	Cerrado	SPL	0	NA	NA
Euscarthmus_meloryphus	17/06/2007	dry	Cerrado	SPL	0	NA	NA
Volatinia_jacarina	17/06/2007	dry	Cerrado	SPL	0	NA	NA
Volatinia_jacarina	17/06/2007	dry	Cerrado	SPL	0	NA	NA
Phaeomyias_murina	29/10/2007	dry	Cerrado	SPC	0	NA	NA
Elaenia_chiriquensis	17/06/2007	dry	Cerrado	SPL	0	NA	NA
Cnemotriccus_fuscatus	17/06/2007	dry	Cerrado	SPL	0	NA	NA
Volatinia_jacarina	17/06/2007	dry	Cerrado	SPL	0	NA	NA
Hemitriccus_margaritaceiventer	17/06/2007	dry	Cerrado	SPL	0	NA	NA
Formicivora_rufa	17/06/2007	dry	Cerrado	SPL	1	NO_ID	NO_ID
Thamnophilus_torquatus	17/06/2007	dry	Cerrado	SPL	0	NA	NA
Elaenia_chiriquensis	17/06/2007	dry	Cerrado	SPL	1	NO_ID	NO_ID
Nystalus_maculatus	17/06/2007	dry	Cerrado	SPL	1	NO_ID	NO_ID
Melanerpes_candidus	17/06/2007	dry	Cerrado	SPL	0	NA	NA
Hypocnemoides_maculicauda	17/03/2006	rain	Cerrado	UA	0	NA	NA
Cantorchilus_leucotis	17/03/2006	rain	Cerrado	UA	1	NO_ID	NO_ID
Cantorchilus_leucotis	17/03/2006	rain	Cerrado	UA	1	Haemoproteus_sp.	TOC-3
Cantorchilus_leucotis	17/03/2006	rain	Cerrado	UA	1	Plasmodium_sp	TOC-11
Cantorchilus_leucotis	17/03/2006	rain	Cerrado	UA	1	Plasmodium_sp	TOC-11
Dendroplex_picus	17/03/2006	rain	Cerrado	UA	0	NA	NA
Turdus_leucomelas	17/03/2006	rain	Cerrado	UA	1	NO_ID	NO_ID
Turdus_leucomelas	17/03/2006	rain	Cerrado	UA	1	NO_ID	NO_ID
Turdus_leucomelas	17/03/2006	rain	Cerrado	UA	1	NO_ID	NO_ID
Sublegatus_modestus	16/06/2007	dry	Cerrado	SPL	0	NA	NA
Sittasomus_griseicapillus	16/06/2007	dry	Cerrado	SPL	1	NO_ID	NO_ID
Elaenia_cristata	16/06/2007	dry	Cerrado	SPL	0	NA	NA
Elaenia_chiriquensis	16/06/2007	dry	Cerrado	SPL	0	NA	NA
Elaenia_chiriquensis	16/06/2007	dry	Cerrado	SPL	1	NO_ID	NO_ID
Elaenia_chiriquensis	16/06/2007	dry	Cerrado	SPL	1	NO_ID	NO_ID
Elaenia_chiriquensis	16/06/2007	dry	Cerrado	SPL	0	NA	NA
Elaenia_chiriquensis	16/06/2007	dry	Cerrado	SPL	0	NA	NA
Elaenia_cristata	16/06/2007	dry	Cerrado	SPL	0	NA	NA
Elaenia_cristata	16/06/2007	dry	Cerrado	SPL	0	NA	NA
Elaenia_chiriquensis	16/06/2007	dry	Cerrado	SPL	1	Haemoproteus_sp.	TOC-5
Elaenia_chiriquensis	16/06/2007	dry	Cerrado	SPL	1	NO_ID	NO_ID
Elaenia_chiriquensis	16/06/2007	dry	Cerrado	SPL	1	NO_ID	NO_ID
Elaenia_chiriquensis	16/06/2007	dry	Cerrado	SPL	0	NA	NA
Elaenia_chiriquensis	16/06/2007	dry	Cerrado	SPL	0	NA	NA
Elaenia_cristata	16/06/2007	dry	Cerrado	SPL	1	NO_ID	NO_ID
Elaenia_cristata	16/06/2007	dry	Cerrado	SPL	1	NO_ID	NO_ID
Elaenia_flavogaster	16/06/2007	dry	Cerrado	SPL	1	NO_ID	NO_ID
Elaenia_cristata	16/06/2007	dry	Cerrado	SPL	0	NA	NA
Elaenia_flavogaster	16/06/2007	dry	Cerrado	SPL	0	NA	NA
Elaenia_cristata	16/06/2007	dry	Cerrado	SPL	0	NA	NA
Elaenia_chiriquensis	16/06/2007	dry	Cerrado	SPL	0	NA	NA
Elaenia_flavogaster	16/06/2007	dry	Cerrado	SPL	1	NO_ID	NO_ID
Turdus_leucomelas	16/06/2007	dry	Cerrado	SPL	1	Plasmodium_sp	TOC-9
Picumnus_albosquamatus	15/09/2006	dry	Cerrado	UA	0	NA	NA
Pipra_fasciicauda	15/09/2006	dry	Cerrado	UA	1	NO_ID	NO_ID
Tangara_cayana	15/09/2006	dry	Cerrado	UA	0	NA	NA
Hemitriccus_striaticollis	15/07/2007	dry	Cerrado	SPC	0	NA	NA
Poecilotriccus_fumifrons	15/07/2007	dry	Cerrado	SPC	1	Plasmodium_sp	TOC-15
Hemitriccus_striaticollis	15/07/2007	dry	Cerrado	SPC	0	NA	NA
Hylophilus_pectoralis	15/07/2007	dry	Cerrado	SPC	0	NA	NA
Myiopagis_viridicata	15/07/2007	dry	Cerrado	SPC	0	NA	NA
Cnemotriccus_fuscatus	15/07/2007	dry	Cerrado	SPC	0	NA	NA
Elaenia_cristata	15/07/2007	dry	Cerrado	SPC	0	NA	NA
Manacus_manacus	04/02/2007	rain	Cerrado	SPL	1	NO_ID	NO_ID
Myiopagis_gaimardii	15/07/2007	dry	Cerrado	SPC	0	NA	NA
Cnemotriccus_fuscatus	15/07/2007	dry	Cerrado	SPC	0	NA	NA
Pachyramphus_polychopterus	15/07/2007	dry	Cerrado	SPC	0	NA	NA
Taraba_major	15/07/2007	dry	Cerrado	SPC	1	NO_ID	NO_ID
Coereba_flaveola	14/07/2007	dry	Cerrado	SPC	1	NO_ID	NO_ID
Leptopogon_amaurocephalus	14/07/2007	dry	Cerrado	SPC	0	NA	NA
Myiopagis_gaimardii	14/07/2007	dry	Cerrado	SPC	1	NO_ID	NO_ID
Leptopogon_amaurocephalus	14/07/2007	dry	Cerrado	SPC	1	NO_ID	NO_ID
Poecilotriccus_fumifrons	14/07/2007	dry	Cerrado	SPC	0	NA	NA
Platyrinchus_mystaceus	14/07/2007	dry	Cerrado	SPC	0	NA	NA
Manacus_manacus	06/04/2007	rain	Cerrado	SPC	1	Haemoproteus_sp.	TOC-8
Tachyphonus_cristatus	14/07/2007	dry	Cerrado	SPC	1	NO_ID	NO_ID
Elaenia_chiriquensis	14/07/2007	dry	Cerrado	SPC	0	NA	NA
Manacus_manacus	14/07/2007	dry	Cerrado	SPC	1	NO_ID	NO_ID
Pipra_fasciicauda	14/07/2007	dry	Cerrado	SPC	1	NO_ID	NO_ID
Dysithamnus_mentalis	14/07/2007	dry	Cerrado	SPC	0	NA	NA
Pipra_fasciicauda	14/07/2007	dry	Cerrado	SPC	1	NO_ID	NO_ID
Dysithamnus_mentalis	14/07/2007	dry	Cerrado	SPC	0	NA	NA
Elaenia_mesoleuca	14/07/2007	dry	Cerrado	SPC	1	NO_ID	NO_ID
Pipra_fasciicauda	14/07/2007	dry	Cerrado	SPC	0	NA	NA
Pipra_fasciicauda	14/07/2007	dry	Cerrado	SPC	0	NA	NA
Formicivora_grisea	14/07/2007	dry	Cerrado	SPC	1	NO_ID	NO_ID
Pipra_fasciicauda	14/07/2007	dry	Cerrado	SPC	0	NA	NA
Pipra_fasciicauda	14/07/2007	dry	Cerrado	SPC	1	NO_ID	NO_ID
Pipra_fasciicauda	14/07/2007	dry	Cerrado	SPC	0	NA	NA
Dacnis_cayana	14/07/2007	dry	Cerrado	SPC	0	NA	NA
Manacus_manacus	14/07/2007	dry	Cerrado	SPC	1	NO_ID	NO_ID
Euphonia_violacea	14/07/2007	dry	Cerrado	SPC	1	NO_ID	NO_ID
Dacnis_cayana	14/07/2007	dry	Cerrado	SPC	0	NA	NA
Pipra_fasciicauda	14/07/2007	dry	Cerrado	SPC	1	NO_ID	NO_ID
Picumnus_albosquamatus	14/07/2007	dry	Cerrado	SPC	0	NA	NA
Cnemotriccus_fuscatus	14/07/2007	dry	Cerrado	SPC	1	NO_ID	NO_ID
Euphonia_violacea	14/07/2007	dry	Cerrado	SPC	0	NA	NA
Lathrotriccus_euleri	14/07/2007	dry	Cerrado	SPC	0	NA	NA
Picumnus_albosquamatus	14/07/2007	dry	Cerrado	SPC	0	NA	NA
Myiarchus_ferox	14/07/2007	dry	Cerrado	SPC	0	NA	NA
Casiornis_fuscus	14/07/2007	dry	Cerrado	SPC	0	NA	NA
Galbula_ruficauda	14/07/2007	dry	Cerrado	SPC	1	NO_ID	NO_ID
Dendroplex_picus	14/07/2007	dry	Cerrado	SPC	1	NO_ID	NO_ID
Ramphotrigon_ruficauda	14/07/2007	dry	Cerrado	SPC	0	NA	NA
Corythopis_torquatus	14/07/2007	dry	Cerrado	SPC	0	NA	NA
Saltator_maximus	14/07/2007	dry	Cerrado	SPC	1	NO_ID	NO_ID
Thamnophilus_doliatus	14/07/2007	dry	Cerrado	SPC	0	NA	NA
Cyanocompsa_cyanoides	14/07/2007	dry	Cerrado	SPC	1	NO_ID	NO_ID
Elaenia_spectabilis	14/07/2007	dry	Cerrado	SPC	0	NA	NA
Turdus_amaurochalinus	14/07/2007	dry	Cerrado	SPC	0	NA	NA
Nyctidromus_albicollis	14/07/2007	dry	Cerrado	SPC	0	NA	NA
Vireo_olivaceus	13/01/2008	rain	Cerrado	UA	1	NO_ID	NO_ID
Myiopagis_gaimardii	13/01/2008	rain	Cerrado	UA	1	NO_ID	NO_ID
Formicivora_grisea	12/01/2008	rain	Cerrado	UA	1	NO_ID	NO_ID
Formicivora_grisea	12/01/2008	rain	Cerrado	UA	1	Plasmodium_sp	TOC-24
Hypocnemoides_maculicauda	12/01/2008	rain	Cerrado	UA	1	NO_ID	NO_ID
Turdus_leucomelas	12/01/2008	rain	Cerrado	UA	0	NA	NA
Tolmomyias_flaviventris	11/04/2007	dry	Cerrado	SPL	0	NA	NA
Tolmomyias_flaviventris	11/04/2007	rain	Cerrado	SPL	1	NO_ID	NO_ID
Camptostoma_obsoletum	11/03/2007	rain	Cerrado	SPL	1	NO_ID	NO_ID
Formicivora_grisea	22/03/2008	rain	Cerrado	SPL	0	NA	NA
Formicivora_rufa	22/03/2008	rain	Cerrado	SPL	0	NA	NA
Volatinia_jacarina	22/03/2008	rain	Cerrado	SPL	0	NA	NA
Formicivora_rufa	22/03/2008	rain	Cerrado	SPL	0	NA	NA
Formicivora_rufa	22/03/2008	rain	Cerrado	SPL	0	NA	NA
Elaenia_cristata	22/03/2008	rain	Cerrado	SPL	0	NA	NA
Elaenia_cristata	22/03/2008	rain	Cerrado	SPL	0	NA	NA
Elaenia_flavogaster	22/03/2008	rain	Cerrado	SPL	1	Haemoproteus_sp.	TOC-2
Elaenia_cristata	22/03/2008	rain	Cerrado	SPL	1	NO_ID	NO_ID
Elaenia_cristata	23/03/2008	rain	Cerrado	SPL	1	Plasmodium_sp	TOC-4
Elaenia_cristata	22/03/2008	rain	Cerrado	SPL	0	NA	NA
Elaenia_parvirostris	22/03/2008	rain	Cerrado	SPL	0	NA	NA
Basileuterus_culicivorus	22/03/2008	rain	Cerrado	SPL	0	NA	NA
Pipra_fasciicauda	19/04/2008	rain	Cerrado	SPC	1	NO_ID	NO_ID
Pipra_fasciicauda	19/04/2008	rain	Cerrado	SPC	0	NA	NA
Pipra_fasciicauda	19/04/2008	rain	Cerrado	SPC	0	NA	NA
Pipra_fasciicauda	19/04/2008	rain	Cerrado	SPC	1	Haemoproteus_sp.	TOC-22
Euphonia_violacea	19/04/2008	rain	Cerrado	SPC	0	NA	NA
Pipra_fasciicauda	19/04/2008	rain	Cerrado	SPC	0	NA	NA
Pipra_fasciicauda	19/04/2008	rain	Cerrado	SPC	1	Haemoproteus_sp.	TOC-2
Pipra_fasciicauda	19/04/2008	rain	Cerrado	SPC	1	NO_ID	NO_ID
Coereba_flaveola	19/04/2008	rain	Cerrado	SPC	0	NA	NA
Pipra_fasciicauda	24/04/2008	rain	Cerrado	SPC	0	NA	NA
Dysithamnus_mentalis	24/04/2008	rain	Cerrado	SPC	0	NA	NA
Corythopis_torquatus	24/04/2008	rain	Cerrado	SPC	0	NA	NA
Volatinia_jacarina	11/03/2007	rain	Cerrado	SPL	1	Haemoproteus_sp.	TOC-3
Camptostoma_obsoletum	11/03/2007	rain	Cerrado	SPL	0	NA	NA
Camptostoma_obsoletum	11/03/2007	rain	Cerrado	SPL	0	NA	NA
Volatinia_jacarina	11/03/2007	rain	Cerrado	SPL	1	NO_ID	NO_ID
Elaenia_cristata	11/03/2007	rain	Cerrado	SPL	0	NA	NA
Formicivora_grisea	11/03/2007	rain	Cerrado	SPL	0	NA	NA
Hemitriccus_margaritaceiventer	11/03/2007	rain	Cerrado	SPL	0	NA	NA
Tachyphonus_rufus	11/03/2007	rain	Cerrado	SPL	0	NA	NA
Hemitriccus_striaticollis	10/07/2007	rain	Cerrado	UA	0	NA	NA
Hemitriccus_striaticollis	10/07/2007	dry	Cerrado	UA	0	NA	NA
Pipra_fasciicauda	10/07/2007	dry	Cerrado	UA	1	NO_ID	NO_ID
Pipra_fasciicauda	21/04/2008	rain	Cerrado	SPC	0	NA	NA
Mionectes_oleagineus	21/04/2008	rain	Cerrado	SPC	0	NA	NA
Pipra_fasciicauda	21/04/2008	rain	Cerrado	SPC	0	NA	NA
Coereba_flaveola	21/04/2008	rain	Cerrado	SPC	0	NA	NA
Pipra_fasciicauda	21/04/2008	rain	Cerrado	SPC	0	NA	NA
Myiopagis_viridicata	21/04/2008	rain	Cerrado	SPC	0	NA	NA
Formicivora_grisea	21/04/2008	rain	Cerrado	SPC	1	Haemoproteus_sp.	TOC-2
Coereba_flaveola	21/04/2008	rain	Cerrado	SPC	0	NA	NA
Pipra_fasciicauda	21/04/2008	rain	Cerrado	SPC	0	NA	NA
Pipra_fasciicauda	21/04/2008	rain	Cerrado	SPC	1	NO_ID	NO_ID
Pipra_fasciicauda	21/04/2008	rain	Cerrado	SPC	0	NA	NA
Pipra_fasciicauda	21/04/2008	rain	Cerrado	SPC	0	NA	NA
Pipra_fasciicauda	21/04/2008	rain	Cerrado	SPC	0	NA	NA
Pipra_fasciicauda	24/04/2008	rain	Cerrado	SPC	1	NO_ID	NO_ID
Coereba_flaveola	21/04/2008	rain	Cerrado	SPC	1	NO_ID	NO_ID
Myrmotherula_multostriata	24/04/2008	rain	Cerrado	SPC	1	Haemoproteus_sp.	TOC-2
Hylophilus_pectoralis	24/04/2008	rain	Cerrado	SPC	1	NO_ID	NO_ID
Pipra_fasciicauda	24/04/2008	rain	Cerrado	SPC	1	Haemoproteus_sp.	TOC-2
Coereba_flaveola	24/04/2008	rain	Cerrado	SPC	1	Haemoproteus_sp.	TOC-2
Pipra_fasciicauda	24/04/2008	rain	Cerrado	SPC	1	NO_ID	NO_ID
Pipra_fasciicauda	24/04/2008	rain	Cerrado	SPC	1	NO_ID	NO_ID
Pipra_fasciicauda	24/04/2008	rain	Cerrado	SPC	1	NO_ID	NO_ID
Myrmotherula_multostriata	21/04/2008	rain	Cerrado	SPC	0	NA	NA
Myiopagis_gaimardii	21/04/2008	rain	Cerrado	SPC	1	Haemoproteus_sp.	TOC-31
Pipra_fasciicauda	21/04/2008	rain	Cerrado	SPC	1	Haemoproteus_sp.	TOC-2
Dendroplex_picus	10/07/2007	dry	Cerrado	UA	0	NA	NA
Turdus_leucomelas	10/06/2006	dry	Cerrado	UA	1	NO_ID	NO_ID
Formicivora_rufa	27/04/2008	rain	Cerrado	SPL	0	NA	NA
Elaenia_cristata	10/12/2008	rain	Cerrado	UA	1	NO_ID	NO_ID
Formicivora_rufa	18/10/2008	rain	Cerrado	UA	1	NO_ID	NO_ID
Formicivora_rufa	18/10/2008	rain	Cerrado	UA	1	NO_ID	NO_ID
Elaenia_cristata	18/10/2008	rain	Cerrado	UA	0	NA	NA
Hemitriccus_margaritaceiventer	18/10/2008	rain	Cerrado	UA	1	NO_ID	NO_ID
Thlypopsis_sordida	18/10/2008	rain	Cerrado	UA	1	NO_ID	NO_ID
Coereba_flaveola	18/10/2008	rain	Cerrado	UA	1	Plasmodium_sp	TOC-28
Coryphospingus_pileatus	18/10/2008	rain	Cerrado	UA	1	NO_ID	NO_ID
Elaenia_cristata	18/10/2008	rain	Cerrado	UA	1	NO_ID	NO_ID
Elaenia_cristata	18/10/2008	rain	Cerrado	UA	1	NO_ID	NO_ID
Hemithraupis_guira	08/10/2008	rain	Cerrado	UA	1	NO_ID	NO_ID
Hemithraupis_guira	18/10/2008	rain	Cerrado	UA	1	Plasmodium_sp	TOC-15
Volatinia_jacarina	18/10/2008	rain	Cerrado	UA	1	NO_ID	NO_ID
Phaeomyias_murina	10/12/2008	rain	Cerrado	UA	0	NA	NA
Coryphospingus_pileatus	18/10/2008	rain	Cerrado	UA	1	Plasmodium_sp	TOC-4
Thlypopsis_sordida	18/10/2008	rain	Cerrado	UA	1	NO_ID	NO_ID
Leptopogon_amaurocephalus	25/10/2008	rain	Cerrado	UA	0	NA	NA
Hemithraupis_guira	18/10/2008	rain	Cerrado	UA	1	NO_ID	NO_ID
Leptopogon_amaurocephalus	18/10/2008	rain	Cerrado	UA	1	NO_ID	NO_ID
Coereba_flaveola	18/10/2008	rain	Cerrado	UA	0	NA	NA
Myiopagis_viridicata	25/10/2008	rain	Cerrado	UA	0	NA	NA
Elaenia_cristata	18/10/2008	rain	Cerrado	UA	0	NA	NA
Sporophila_plumbea	10/03/2007	rain	Cerrado	SPL	1	NO_ID	NO_ID
Coereba_flaveola	10/12/2008	rain	Cerrado	UA	1	NO_ID	NO_ID
Myiopagis_viridicata	10/12/2008	rain	Cerrado	UA	0	NA	NA
Myiopagis_viridicata	10/12/2008	rain	Cerrado	UA	0	NA	NA
Coereba_flaveola	10/12/2008	rain	Cerrado	UA	0	NA	NA
Volatinia_jacarina	10/12/2008	rain	Cerrado	UA	0	NA	NA
Volatinia_jacarina	10/12/2008	rain	Cerrado	UA	1	NO_ID	NO_ID
Volatinia_jacarina	10/12/2008	rain	Cerrado	UA	0	NA	NA
Volatinia_jacarina	10/12/2008	rain	Cerrado	UA	1	NO_ID	NO_ID
Phaeomyias_murina	18/10/2008	rain	Cerrado	UA	0	NA	NA
Coereba_flaveola	10/12/2008	rain	Cerrado	UA	1	NO_ID	NO_ID
Coereba_flaveola	09/05/2009	dry	Cerrado	UA	1	NO_ID	NO_ID
Coereba_flaveola	31/05/2009	dry	Cerrado	UA	1	NO_ID	NO_ID
Basileuterus_culicivorus	20/06/2009	dry	Cerrado	UA	0	NA	NA
Coryphospingus_pileatus	24/07/2009	dry	Cerrado	UA	1	NO_ID	NO_ID
Formicivora_rufa	24/07/2009	dry	Cerrado	UA	0	NA	NA
Coryphospingus_pileatus	02/08/2009	dry	Cerrado	UA	1	NO_ID	NO_ID
Elaenia_cristata	10/12/2008	rain	Cerrado	UA	1	NO_ID	NO_ID
Lepidocolaptes_angustirostris	09/05/2009	dry	Cerrado	UA	0	NA	NA
Coryphospingus_pileatus	23/05/2009	dry	Cerrado	UA	0	NA	NA
Myiarchus_swainsoni	31/05/2009	dry	Cerrado	UA	0	NA	NA
Coryphospingus_pileatus	31/05/2009	dry	Cerrado	UA	0	NA	NA
Coryphospingus_pileatus	20/06/2009	dry	Cerrado	UA	1	Plasmodium_sp	TOC-32
Lathrotriccus_euleri	20/06/2009	dry	Cerrado	UA	0	NA	NA
Cantorchilus_leucotis	08/08/2009	dry	Cerrado	UA	1	Plasmodium_sp	TOC-16
Galbula_ruficauda	24/06/2009	dry	Cerrado	UA	0	NA	NA
Myiarchus_swainsoni	24/07/2009	dry	Cerrado	UA	0	NA	NA
Coryphospingus_pileatus	02/08/2009	dry	Cerrado	UA	1	NO_ID	NO_ID
Tangara_cayana	02/08/2009	dry	Cerrado	UA	1	NO_ID	NO_ID
Pheugopedius_genibarbis	06/04/2007	rain	Cerrado	SPC	0	NA	NA
Pheugopedius_genibarbis	16/06/2007	dry	Cerrado	SPL	0	NA	NA
Ramphocelus_carbo	20/09/2007	dry	Cerrado	SPC	1	NO_ID	NO_ID
Ramphocelus_carbo	07/02/2008	rain	Cerrado	SPC	1	NO_ID	NO_ID
Ramphocelus_carbo	02/07/2008	rain	Cerrado	SPC	1	NO_ID	NO_ID
Pheugopedius_genibarbis	21/10/2007	dry	Cerrado	SPL	0	NA	NA
Ramphocelus_carbo	18/05/2006	dry	Cerrado	UA	0	NA	NA
Ramphocelus_carbo	22/06/2006	dry	Cerrado	UA	1	NO_ID	NO_ID
Ramphocelus_carbo	24/09/2006	dry	Cerrado	SPL	0	NA	NA
Synallaxis_albescens	10/03/2007	rain	Cerrado	SPL	1	NO_ID	NO_ID
Ammodramus_humeralis	10/03/2007	rain	Cerrado	SPL	1	NO_ID	NO_ID
Elaenia_cristata	10/03/2007	rain	Cerrado	SPL	0	NA	NA
Elaenia_chiriquensis	10/03/2007	rain	Cerrado	SPL	1	NO_ID	NO_ID
Neothraupis_fasciata	10/03/2007	rain	Cerrado	SPL	1	Plasmodium_sp	TOC-10
Pipra_fasciicauda	09/08/2006	dry	Cerrado	UA	1	Haemoproteus_sp.	TOC-3
Galbula_ruficauda	09/08/2006	dry	Cerrado	UA	0	NA	NA
Dendroplex_picus	09/08/2006	dry	Cerrado	UA	0	NA	NA
Turdus_leucomelas	09/08/2006	rain	Cerrado	UA	1	Plasmodium_sp	TOC-9
Turdus_leucomelas	09/08/2006	rain	Cerrado	UA	1	Plasmodium_sp	TOC-9
Hemitriccus_striaticollis	07/04/2007	rain	Cerrado	SPC	1	Plasmodium_sp	TOC-15
Coereba_flaveola	07/04/2007	rain	Cerrado	SPC	0	NA	NA
Columbina_talpacoti	07/04/2007	rain	Cerrado	SPC	0	NA	NA
Hemitriccus_striaticollis	07/02/2008	rain	Cerrado	SPC	0	NA	NA
Myrmotherula_axillaris	07/02/2008	rain	Cerrado	SPC	0	NA	NA
Hemitriccus_striaticollis	06/04/2007	rain	Cerrado	SPC	0	NA	NA
Platyrinchus_mystaceus	06/04/2007	rain	Cerrado	SPC	1	NO_ID	NO_ID
Poecilotriccus_fumifrons	06/04/2007	rain	Cerrado	SPC	1	NO_ID	NO_ID
Poecilotriccus_fumifrons	06/04/2007	rain	Cerrado	SPC	1	NO_ID	NO_ID
Basileuterus_flaveolus	01/03/2007	dry	Cerrado	UA	0	NA	NA
Platyrinchus_mystaceus	06/04/2007	rain	Cerrado	SPC	0	NA	NA
Coereba_flaveola	06/04/2007	rain	Cerrado	SPC	0	NA	NA
Leptopogon_amaurocephalus	06/04/2007	rain	Cerrado	SPC	0	NA	NA
Leptopogon_amaurocephalus	06/04/2007	rain	Cerrado	SPC	1	NO_ID	NO_ID
Pipra_fasciicauda	06/04/2007	rain	Cerrado	SPC	1	NO_ID	NO_ID
Tolmomyias_poliocephalus	06/04/2007	rain	Cerrado	SPC	1	NO_ID	NO_ID
Pipra_fasciicauda	06/04/2007	rain	Cerrado	SPC	1	Plasmodium_sp	TOC-18
Pipra_fasciicauda	06/04/2007	rain	Cerrado	SPC	1	NO_ID	NO_ID
Pipra_fasciicauda	06/04/2007	rain	Cerrado	SPC	1	NO_ID	NO_ID
Pipra_fasciicauda	06/04/2007	rain	Cerrado	SPC	1	NO_ID	NO_ID
Pipra_fasciicauda	06/04/2007	rain	Cerrado	SPC	1	NO_ID	NO_ID
Manacus_manacus	14/07/2007	dry	Cerrado	SPC	1	NO_ID	NO_ID
Pipra_fasciicauda	06/04/2007	rain	Cerrado	SPC	0	NA	NA
Corythopis_torquatus	06/04/2007	rain	Cerrado	SPC	1	NO_ID	NO_ID
Tachyphonus_luctuosus	06/04/2007	rain	Cerrado	SPC	1	Haemoproteus_sp.	TOC-13
Dysithamnus_mentalis	06/04/2007	rain	Cerrado	SPC	1	NO_ID	NO_ID
Pipra_fasciicauda	06/04/2007	rain	Cerrado	SPC	0	NA	NA
Pipra_fasciicauda	06/04/2007	rain	Cerrado	SPC	1	Haemoproteus_sp.	TOC-20
Pipra_fasciicauda	06/04/2007	rain	Cerrado	SPC	0	NA	NA
Pipra_fasciicauda	06/04/2007	rain	Cerrado	SPC	0	NA	NA
Pipra_fasciicauda	06/04/2007	rain	Cerrado	SPC	0	NA	NA
Picumnus_albosquamatus	07/02/2008	rain	Cerrado	SPC	1	NO_ID	NO_ID
Pipra_fasciicauda	06/04/2007	rain	Cerrado	SPC	1	NO_ID	NO_ID
Manacus_manacus	15/07/2007	dry	Cerrado	SPC	1	NO_ID	NO_ID
Pipra_fasciicauda	06/04/2007	rain	Cerrado	SPC	1	Plasmodium_sp	TOC-18
Pipra_fasciicauda	06/04/2007	rain	Cerrado	SPC	1	NO_ID	NO_ID
Pipra_fasciicauda	06/04/2007	rain	Cerrado	SPC	1	Haemoproteus_sp.	TOC-1
Coryphospingus_pileatus	01/11/2004	rain	Cerrado	UA	1	Haemoproteus_sp.	TOC-2
Cyanerpes_cyaneus	06/04/2007	rain	Cerrado	SPC	1	NO_ID	NO_ID
Pheugopedius_genibarbis	29/10/2007	rain	Cerrado	SPC	0	NA	NA
Pipra_fasciicauda	06/04/2007	rain	Cerrado	SPC	1	NO_ID	NO_ID
Hemitriccus_striaticollis	06/04/2007	rain	Cerrado	SPC	1	NO_ID	NO_ID
Pipra_fasciicauda	06/04/2007	rain	Cerrado	SPC	0	NA	NA
Leptopogon_amaurocephalus	06/04/2007	rain	Cerrado	SPC	1	NO_ID	NO_ID
Dacnis_cayana	06/04/2007	rain	Cerrado	SPC	1	NO_ID	NO_ID
Pipra_fasciicauda	06/04/2007	rain	Cerrado	SPC	0	NA	NA
Myiopagis_gaimardii	06/04/2007	rain	Cerrado	SPC	1	NO_ID	NO_ID
Pipra_fasciicauda	06/04/2007	rain	Cerrado	SPC	1	Plasmodium_sp	TOC-15
Coereba_flaveola	06/04/2007	rain	Cerrado	SPC	1	NO_ID	NO_ID
Pipra_fasciicauda	06/04/2007	rain	Cerrado	SPC	1	NO_ID	NO_ID
Pipra_fasciicauda	06/04/2007	rain	Cerrado	SPC	1	NO_ID	NO_ID
Pipra_fasciicauda	06/04/2007	rain	Cerrado	SPC	0	NA	NA
Pipra_fasciicauda	06/04/2007	rain	Cerrado	SPC	1	NO_ID	NO_ID
Pipra_fasciicauda	06/04/2007	rain	Cerrado	SPC	1	Plasmodium_sp	TOC-18
Pipra_fasciicauda	06/04/2007	rain	Cerrado	SPC	1	Plasmodium_sp	TOC-4
Pipra_fasciicauda	06/04/2007	rain	Cerrado	SPC	0	NA	NA
Cyanocompsa_cyanoides	06/04/2007	rain	Cerrado	SPC	1	NO_ID	NO_ID
Inezia_subflava	06/02/2008	rain	Cerrado	SPC	0	NA	NA
Myiopagis_gaimardii	06/02/2008	rain	Cerrado	SPC	0	NA	NA
Pipra_fasciicauda	06/02/2008	rain	Cerrado	SPC	0	NA	NA
Coereba_flaveola	06/02/2008	rain	Cerrado	SPC	0	NA	NA
Coereba_flaveola	06/02/2008	rain	Cerrado	SPC	0	NA	NA
Chloroceryle_aenea	06/02/2008	rain	Cerrado	SPC	0	NA	NA
Pipra_fasciicauda	06/02/2008	rain	Cerrado	SPC	0	NA	NA
Euphonia_violacea	06/02/2008	rain	Cerrado	SPC	0	NA	NA
Coereba_flaveola	06/02/2008	rain	Cerrado	SPC	1	Plasmodium_sp	TOC-10
Pipra_fasciicauda	05/04/2007	rain	Cerrado	SPC	1	NO_ID	NO_ID
Coereba_flaveola	05/04/2007	rain	Cerrado	SPC	1	NO_ID	NO_ID
Pipra_fasciicauda	05/04/2007	rain	Cerrado	SPC	1	NO_ID	NO_ID
Pipra_fasciicauda	05/04/2007	rain	Cerrado	SPC	1	Plasmodium_sp	TOC-4
Sakesphorus_luctuosus	05/04/2007	rain	Cerrado	SPC	1	Haemoproteus_sp.	TOC-1
Basileuterus_culicivorus	03/06/2006	dry	Cerrado	SPL	0	NA	NA
Pipra_fasciicauda	03/06/2006	dry	Cerrado	SPL	0	NA	NA
Basileuterus_culicivorus	03/06/2006	dry	Cerrado	SPL	0	NA	NA
Saltator_maximus	03/06/2006	dry	Cerrado	SPL	1	NO_ID	NO_ID
Saltator_maximus	03/06/2006	dry	Cerrado	SPL	1	NO_ID	NO_ID
Saltator_maximus	03/06/2006	dry	Cerrado	SPL	1	Plasmodium_sp	TOC-9
Pipra_fasciicauda	20/04/2008	rain	Cerrado	SPC	0	NA	NA
Xiphorhynchus_obsoletus	02/07/2008	rain	Cerrado	SPC	1	NO_ID	NO_ID
Elaenia_cristata	22/03/2008	rain	Cerrado	SPL	0	NA	NA
Melanopareia_torquata	29/03/2008	rain	Cerrado	SPL	0	NA	NA
Formicivora_rufa	29/03/2008	rain	Cerrado	SPL	0	NA	NA
Manacus_manacus	07/02/2008	rain	Cerrado	SPC	0	NA	NA
Tachyphonus_cristatus	24/04/2008	rain	Cerrado	SPC	1	Haemoproteus_sp.	TOC-2
Coereba_flaveola	20/04/2008	rain	Cerrado	SPC	0	NA	NA
Pipra_fasciicauda	20/04/2008	rain	Cerrado	SPC	1	Haemoproteus_sp.	TOC-2
Pipra_fasciicauda	20/04/2008	rain	Cerrado	SPC	0	NA	NA
Pipra_fasciicauda	20/04/2008	rain	Cerrado	SPC	1	NO_ID	NO_ID
Myiopagis_gaimardii	20/04/2008	rain	Cerrado	SPC	0	NA	NA
Schistochlamys_ruficapillus	18/10/2008	rain	Cerrado	UA	1	NO_ID	NO_ID
Myiarchus_swainsoni	18/10/2008	rain	Cerrado	UA	0	NA	NA
Schistochlamys_ruficapillus	03/10/2009	dry	Cerrado	UA	1	NO_ID	NO_ID
Schistochlamys_ruficapillus	18/10/2008	rain	Cerrado	UA	1	NO_ID	NO_ID
Tangara_cayana	18/10/2008	rain	Cerrado	UA	0	NA	NA
Schistochlamys_ruficapillus	18/10/2008	rain	Cerrado	UA	1	NO_ID	NO_ID
Coryphospingus_pileatus	18/10/2008	rain	Cerrado	UA	0	NA	NA
Tangara_cayana	25/10/2008	rain	Cerrado	UA	0	NA	NA
Myiarchus_swainsoni	25/10/2008	rain	Cerrado	UA	0	NA	NA
Thlypopsis_sordida	25/10/2008	rain	Cerrado	UA	0	NA	NA
Thlypopsis_sordida	25/10/2008	rain	Cerrado	UA	0	NA	NA
Thlypopsis_sordida	25/10/2008	rain	Cerrado	UA	0	NA	NA
Tangara_cayana	25/10/2008	rain	Cerrado	UA	0	NA	NA
Formicivora_rufa	25/10/2008	rain	Cerrado	UA	0	NA	NA
Thlypopsis_sordida	25/10/2008	rain	Cerrado	UA	0	NA	NA
Thamnophilus_torquatus	25/10/2008	rain	Cerrado	UA	0	NA	NA
Pachyramphus_polychopterus	10/12/2008	rain	Cerrado	UA	0	NA	NA
Coryphospingus_pileatus	10/12/2008	rain	Cerrado	UA	1	NO_ID	NO_ID
Pipra_fasciicauda	20/04/2008	rain	Cerrado	SPC	0	NA	NA
Ramphocelus_carbo	14/07/2007	dry	Cerrado	SPC	0	NA	NA
Pipra_fasciicauda	20/04/2008	rain	Cerrado	SPC	0	NA	NA
Pipra_fasciicauda	20/04/2008	rain	Cerrado	SPC	0	NA	NA
Pipra_fasciicauda	20/04/2008	rain	Cerrado	SPC	1	Haemoproteus_sp.	TOC-31
Pipra_fasciicauda	20/04/2008	rain	Cerrado	SPC	0	NA	NA
Pipra_fasciicauda	20/04/2008	rain	Cerrado	SPC	1	Haemoproteus_sp.	TOC-2
Pipra_fasciicauda	20/04/2008	rain	Cerrado	SPC	1	NO_ID	NO_ID
Pheugopedius_genibarbis	29/10/2007	rain	Cerrado	SPC	0	NA	NA
Cacicus_cela	02/07/2008	rain	Cerrado	SPC	1	NO_ID	NO_ID
Ramphocelus_carbo	29/10/2007	dry	Cerrado	SPC	1	NO_ID	NO_ID
Ramphocelus_carbo	30/10/2007	dry	Cerrado	SPC	1	NO_ID	NO_ID
Thraupis_palmarum	21/04/2008	rain	Cerrado	SPC	0	NA	NA
Thraupis_palmarum	21/04/2008	rain	Cerrado	SPC	0	NA	NA
Turdus_leucomelas	27/04/2008	rain	Cerrado	SPL	1	NO_ID	NO_ID
Sakesphorus_luctuosus	24/02/2008	rain	Cerrado	SPC	0	NA	NA
Sakesphorus_luctuosus	21/04/2008	rain	Cerrado	SPC	1	Haemoproteus_sp.	TOC-2
Pheugopedius_genibarbis	20/04/2008	rain	Cerrado	SPC	0	NA	NA
Picumnus_albosquamatus	20/04/2008	rain	Cerrado	SPC	1	NO_ID	NO_ID
Pheugopedius_genibarbis	20/04/2008	rain	Cerrado	SPC	0	NA	NA
Manacus_manacus	07/02/2008	rain	Cerrado	SPC	0	NA	NA
Dendrocolaptes_certhia	20/04/2008	rain	Cerrado	SPC	1	Haemoproteus_sp.	TOC-31
Manacus_manacus	14/07/2007	dry	Cerrado	SPC	1	NO_ID	NO_ID
Manacus_manacus	06/04/2007	rain	Cerrado	SPC	0	NA	NA
Myiopagis_gaimardii	07/02/2008	rain	Cerrado	SPC	1	NO_ID	NO_ID
Pipra_fasciicauda	07/02/2008	rain	Cerrado	SPC	0	NA	NA
Manacus_manacus	20/07/2007	dry	Cerrado	SPC	1	NO_ID	NO_ID
Xenops_minutus	07/02/2008	rain	Cerrado	SPC	0	NA	NA
Dysithamnus_mentalis	07/02/2008	rain	Cerrado	SPC	0	NA	NA
Myiopagis_gaimardii	07/02/2008	rain	Cerrado	SPC	0	NA	NA
Myiarchus_ferox	07/02/2008	rain	Cerrado	SPC	0	NA	NA
Ramphocelus_carbo	30/10/2007	dry	Cerrado	SPC	1	NO_ID	NO_ID
Dendrocincla_fuliginosa	07/02/2008	rain	Cerrado	SPC	0	NA	NA
Piranga_flava	07/02/2008	rain	Cerrado	SPC	0	NA	NA
Pipra_fasciicauda	06/02/2008	rain	Cerrado	SPC	0	NA	NA
Pipra_fasciicauda	06/02/2008	rain	Cerrado	SPC	0	NA	NA
Coereba_flaveola	06/02/2008	rain	Cerrado	SPC	0	NA	NA
Pipra_fasciicauda	06/02/2008	rain	Cerrado	SPC	0	NA	NA
Pipra_fasciicauda	06/02/2008	rain	Cerrado	SPC	0	NA	NA
Pipra_fasciicauda	06/02/2008	rain	Cerrado	SPC	0	NA	NA
Pipra_fasciicauda	06/02/2008	rain	Cerrado	SPC	1	NO_ID	NO_ID
Pteroglossus_inscriptus	06/02/2008	rain	Cerrado	SPC	1	NO_ID	NO_ID
Cyanocompsa_cyanoides	07/02/2008	rain	Cerrado	SPC	1	NO_ID	NO_ID
Turdus_leucomelas	13/01/2008	rain	Cerrado	UA	0	NA	NA
Dendroplex_picus	12/01/2008	rain	Cerrado	UA	1	NO_ID	NO_ID
Poecilotriccus_fumifrons	29/10/2007	rain	Cerrado	SPC	0	NA	NA
Elaenia_chiriquensis	21/10/2007	rain	Cerrado	SPL	1	NO_ID	NO_ID
Tyrannus_albogularis	21/10/2007	rain	Cerrado	SPL	0	NA	NA
Tachyphonus_rufus	21/10/2007	rain	Cerrado	SPL	1	NO_ID	NO_ID
Tachyphonus_rufus	21/10/2007	rain	Cerrado	SPL	0	NA	NA
Serpophaga_subcritata	04/09/2007	dry	Cerrado	UA	1	NO_ID	NO_ID
Serpophaga_subcritata	04/09/2007	dry	Cerrado	UA	0	NA	NA
Elaenia_flavogaster	04/09/2007	dry	Cerrado	UA	0	NA	NA
Myiarchus_swainsoni	04/09/2007	dry	Cerrado	UA	0	NA	NA
Elaenia_cristata	04/09/2007	dry	Cerrado	UA	0	NA	NA
Schistochlamys_ruficapillus	10/12/2008	rain	Cerrado	UA	0	NA	NA
Saltator_maximus	10/12/2008	rain	Cerrado	UA	0	NA	NA
Schistochlamys_ruficapillus	10/12/2008	rain	Cerrado	UA	1	NO_ID	NO_ID
Tachyphonus_rufus	23/05/2009	dry	Cerrado	UA	1	NO_ID	NO_ID
Thraupis_sayaca	23/05/2009	dry	Cerrado	UA	0	NA	NA
Tachyphonus_rufus	23/05/2009	dry	Cerrado	UA	1	NO_ID	NO_ID
Progne_chalybea	23/07/2009	dry	Cerrado	UA	1	Plasmodium_sp	TOC-15
Progne_chalybea	23/07/2009	dry	Cerrado	UA	0	NA	NA
Progne_chalybea	23/07/2009	dry	Cerrado	UA	0	NA	NA
Lepidocolaptes_angustirostris	24/07/2009	dry	Cerrado	UA	0	NA	NA
Cyclarhis_gujanensis	01/08/2009	dry	Cerrado	UA	1	NO_ID	NO_ID
Monasa_nigrifrons	09/02/2006	rain	Cerrado	UA	1	Plasmodium_sp	TOC-15
Crotophaga_ani	15/07/2007	dry	Cerrado	SPC	1	NO_ID	NO_ID
Crotophaga_ani	15/07/2007	dry	Cerrado	SPC	1	NO_ID	NO_ID
Leptotila_rufaxilla	15/07/2007	dry	Cerrado	SPC	1	NO_ID	NO_ID
Dysithamnus_mentalis	14/07/2007	dry	Cerrado	SPC	1	NO_ID	NO_ID
Manacus_manacus	06/04/2007	rain	Cerrado	SPC	1	NO_ID	NO_ID
Manacus_manacus	06/04/2007	rain	Cerrado	SPC	0	NA	NA
Mimus_saturninus	25/09/2009	dry	Cerrado	SPL	0	NA	NA
Tangara_cayana	11/04/2007	rain	Cerrado	UA	0	NA	NA
Cyclarhis_gujanensis	11/04/2007	rain	Cerrado	UA	0	NA	NA
Cyclarhis_gujanensis	11/04/2007	rain	Cerrado	UA	1	NO_ID	NO_ID
Thamnophilus_amazonicus	06/04/2007	rain	Cerrado	SPC	1	NO_ID	NO_ID
Manacus_manacus	06/04/2007	rain	Cerrado	SPC	1	NO_ID	NO_ID
Manacus_manacus	06/04/2007	rain	Cerrado	SPC	1	Haemoproteus_sp.	TOC-8
Chloroceryle_aenea	06/04/2007	rain	Cerrado	SPC	0	NA	NA
Chloroceryle_aenea	06/04/2007	rain	Cerrado	SPC	1	NO_ID	NO_ID
Manacus_manacus	06/04/2007	rain	Cerrado	SPC	0	NA	NA
Manacus_manacus	06/04/2007	rain	Cerrado	SPC	1	NO_ID	NO_ID
Manacus_manacus	19/04/2008	rain	Cerrado	SPC	1	Haemoproteus_sp.	TOC-2
Picumnus_albosquamatus	06/04/2007	rain	Cerrado	SPC	0	NA	NA
Manacus_manacus	20/04/2008	rain	Cerrado	SPC	1	NO_ID	NO_ID
Pheugopedius_genibarbis	20/04/2008	rain	Cerrado	SPC	0	NA	NA
Galbula_ruficauda	06/04/2007	rain	Cerrado	SPC	1	NO_ID	NO_ID
Formicivora_grisea	06/04/2007	rain	Cerrado	SPC	1	NO_ID	NO_ID
Basileuterus_flaveolus	21/03/2007	dry	Cerrado	UA	1	NO_ID	NO_ID
Picumnus_albosquamatus	21/03/2007	rain	Cerrado	UA	1	NO_ID	NO_ID
Pipra_fasciicauda	21/03/2007	dry	Cerrado	UA	1	Haemoproteus_sp.	TOC-13
Pipra_fasciicauda	21/03/2007	dry	Cerrado	UA	1	NO_ID	NO_ID
Basileuterus_culicivorus	21/03/2007	dry	Cerrado	UA	1	Plasmodium_sp	TOC-10
Taraba_major	21/03/2007	rain	Cerrado	UA	1	NO_ID	NO_ID
Saltator_maximus	24/04/2008	rain	Cerrado	SPC	0	NA	NA
Dendrocolaptes_platyrostris	01/03/2007	rain	Cerrado	UA	0	NA	NA
Coryphospingus_pileatus	11/03/2007	rain	Cerrado	SPL	1	Haemoproteus_sp.	TOC-1
Turdus_leucomelas	22/03/2008	rain	Cerrado	SPL	0	NA	NA
Synallaxis_gujanensis	18/10/2008	rain	Cerrado	UA	0	NA	NA
Schistochlamys_ruficapillus	25/10/2008	rain	Cerrado	UA	1	NO_ID	NO_ID
Schistochlamys_ruficapillus	25/10/2008	rain	Cerrado	UA	1	NO_ID	NO_ID
Columbina_talpacoti	23/05/2009	dry	Cerrado	UA	1	NO_ID	NO_ID
Turdus_leucomelas	23/05/2009	dry	Cerrado	UA	1	NO_ID	NO_ID
Turdus_leucomelas	23/05/2009	dry	Cerrado	UA	1	NO_ID	NO_ID
Turdus_leucomelas	23/05/2009	dry	Cerrado	UA	1	NO_ID	NO_ID
Megarynchus_pitangua	31/05/2009	dry	Cerrado	UA	1	NO_ID	NO_ID
Passer_domesticus	23/07/2009	dry	Cerrado	UA	1	NO_ID	NO_ID
Coryphospingus_pileatus	11/03/2007	rain	Cerrado	SPL	0	NA	NA
Antilophia_galeata	10/03/2007	rain	Cerrado	SPL	1	NO_ID	NO_ID
Tangara_cayana	10/03/2007	rain	Cerrado	SPL	0	NA	NA
Tangara_cayana	10/03/2007	rain	Cerrado	SPL	1	Haemoproteus_sp.	TOC-2
Volatinia_jacarina	04/02/2007	rain	Cerrado	SPL	1	NO_ID	NO_ID
Euscarthmus_rufomarginatus	04/02/2007	rain	Cerrado	SPL	1	Haemoproteus_sp.	TOC-29
Monasa_nigrifrons	02/07/2008	rain	Cerrado	SPC	0	NA	NA
Monasa_nigrifrons	02/07/2008	rain	Cerrado	SPC	1	Haemoproteus_sp.	TOC-22
Colaptes_melanochloros	22/03/2008	rain	Cerrado	SPL	1	NO_ID	NO_ID
Nystalus_maculatus	18/10/2008	rain	Cerrado	UA	1	NO_ID	NO_ID
Trogon_curucui	09/05/2009	dry	Cerrado	UA	1	NO_ID	NO_ID
Pheugopedius_genibarbis	24/09/2006	dry	Cerrado	SPL	0	NA	NA
Poecilotriccus_fumifrons	24/09/2006	dry	Cerrado	UA	0	NA	NA
Arremon_taciturnus	24/09/2007	dry	Cerrado	UA	1	Haemoproteus_sp.	TOC-2
Galbula_flavogaster	24/09/2006	dry	Cerrado	UA	1	Haemoproteus_sp.	TOC-2
Dysithamnus_mentalis	24/09/2006	dry	Cerrado	UA	1	Haemoproteus_sp.	TOC-2
Basileuterus_hypoleucus	24/09/2009	dry	Cerrado	UA	1	Haemoproteus_sp.	TOC-2
Turdus_leucomelas	24/09/2009	dry	Cerrado	UA	1	Plasmodium_sp	TOC-4
Turdus_leucomelas	24/09/2006	dry	Cerrado	SPL	1	Haemoproteus_sp.	TOC-7
Turdus_leucomelas	24/09/2009	dry	Cerrado	UA	1	Plasmodium_sp	TOC-9
Arremon_taciturnus	24/09/2006	dry	Cerrado	UA	1	Plasmodium_sp	TOC-10
Arremon_taciturnus	24/09/2006	dry	Cerrado	UA	1	Plasmodium_sp	TOC-10
Pipra_fasciicauda	24/09/2006	dry	Cerrado	SPL	1	Plasmodium_sp	TOC-17
Galbula_ruficauda	24/09/2006	dry	Cerrado	UA	1	Haemoproteus_sp.	TOC-20
